# Supplementary material for: Identification of hub genes and diagnostic efficacy for triple-negative breast cancer through WGCNA and Mendelian randomization
Source: Discov Oncol. 2024 Apr 12;15:117. doi: 10.1007/s12672-024-00970-w (PMC11014828; doi:10.1007/s12672-024-00970-w)
Supplement: Supplementary file 1 — Supplementary Table S1 [file 12672_2024_970_MOESM1_ESM.xlsx]

## Sheet: Sheet1
Supplementary Table S1: differentially expressed genes between the triple-negative breast cancer group and the normal group.
Gene symbol	LogFC	P-value	Adjusted P-value
TPX2	4.52014	1.33279e-18	2.74708e-13
DEPDC1	3.50535	7.70507e-18	7.94067e-13
ANLN	3.86524	1.61878e-17	1.00487e-12
HIST1H2AG	2.94388	1.95012e-17	1.00487e-12
CASC5	3.94225	9.44855e-17	3.67357e-12
PRC1	3.29761	1.06937e-16	3.67357e-12
C20orf24	2.0607	2.92288e-16	8.60643e-12
HIST1H2BE	2.09143	5.11214e-16	1.31711e-11
NEK2	3.91509	5.98884e-16	1.37155e-11
KIF20A	3.65558	9.6995e-16	1.99922e-11
RIC3	-3.84608	1.36706e-15	2.52878e-11
HIST1H2AJ	2.24363	1.47225e-15	2.52878e-11
TTK	3.78633	1.65186e-15	2.61902e-11
HIST3H2BB	1.96867	1.80846e-15	2.6625e-11
BIRC5	4.40286	2.27075e-15	3.12025e-11
UHRF1	3.28325	3.20304e-15	4.12622e-11
HIST2H2BE	1.78421	3.72513e-15	4.51651e-11
HIST1H2BI	2.24815	5.22095e-15	5.97843e-11
COL17A1	-4.94781	5.52326e-15	5.99173e-11
HIST1H2BD	2.09228	5.95111e-15	6.13308e-11
MLF1IP	3.6226	6.87352e-15	6.74637e-11
HIST1H2BL	2.10098	7.94877e-15	7.4471e-11
HIST1H2BN	2.03038	9.28829e-15	8.32373e-11
MELK	3.45256	1.0032e-14	8.61558e-11
HIST1H2BF	2.02535	1.20473e-14	9.93253e-11
CDCA5	3.59582	1.39868e-14	1.1088e-10
RAD54L	3.73505	1.62341e-14	1.20103e-10
CENPA	4.17787	1.63155e-14	1.20103e-10
HIST1H2BO	2.14255	2.20214e-14	1.5169e-10
HIST1H2AM	2.0878	2.20784e-14	1.5169e-10
NCAPG	3.79707	2.40147e-14	1.59671e-10
UBE2T	3.69406	3.12112e-14	1.95655e-10
HIST1H3B	2.83134	3.13253e-14	1.95655e-10
HIST1H2BM	2.2191	3.40682e-14	2.06529e-10
UBE2C	4.4079	5.23949e-14	3.08554e-10
ECT2	2.76661	5.75513e-14	3.29506e-10
HIST1H2AK	1.53486	6.24031e-14	3.47628e-10
HIST1H2BJ	2.10891	7.2198e-14	3.84043e-10
KIF23	3.96366	7.3583e-14	3.84043e-10
FAM111B	4.32513	7.68411e-14	3.84043e-10
HIST1H2BH	2.31016	7.77348e-14	3.84043e-10
CDKN3	3.65035	7.82563e-14	3.84043e-10
NUSAP1	3.63876	8.01495e-14	3.84187e-10
RACGAP1	2.14372	9.53029e-14	4.46441e-10
HIST1H2BG	2.46659	1.01442e-13	4.64388e-10
HN1	2.83556	1.0364e-13	4.64388e-10
OXTR	-4.40476	1.06487e-13	4.6699e-10
H2AFZ	1.75304	1.21456e-13	5.21541e-10
CKS2	2.80206	1.33648e-13	5.59703e-10
OIP5	3.10569	1.35774e-13	5.59703e-10
SPC25	3.72845	1.41245e-13	5.70837e-10
FN1	4.39952	1.5034e-13	5.95913e-10
HJURP	3.22795	1.90976e-13	7.427e-10
FANCI	2.39846	2.15602e-13	8.22942e-10
HIST1H2AH	1.4883	2.73273e-13	1.0241e-09
CEP55	3.98573	2.83636e-13	1.04396e-09
SMC4	2.28171	3.01148e-13	1.08897e-09
PIK3C2G	-4.41989	3.0894e-13	1.09789e-09
KIAA0101	3.37996	3.45064e-13	1.20547e-09
ASPM	3.90319	3.91171e-13	1.34377e-09
HIST1H2BC	1.88676	4.06621e-13	1.36544e-09
KIF2C	2.68387	4.16034e-13	1.36544e-09
RRM2	2.37021	4.17353e-13	1.36544e-09
SPC24	4.04843	4.8329e-13	1.55646e-09
CLDN11	-3.59823	6.58981e-13	2.08963e-09
PTTG1	3.94662	8.21012e-13	2.56399e-09
HIST1H2AE	2.40709	8.73691e-13	2.68778e-09
HIST2H2AB	2.10644	1.00834e-12	3.05639e-09
CDC45L	4.35676	1.03296e-12	3.08562e-09
FAM83D	3.36458	1.14268e-12	3.34661e-09
CENPF	4.28516	1.1528e-12	3.34661e-09
CCNB1	2.70325	1.2557e-12	3.5947e-09
GINS1	4.09598	1.31242e-12	3.70561e-09
HIST1H2BB	2.17521	1.35588e-12	3.77658e-09
CCNE1	3.15114	1.43672e-12	3.94839e-09
LOC442245	-3.39765	1.51679e-12	4.11361e-09
BUB1	3.16674	1.55291e-12	4.15685e-09
HIST1H2AB	2.28	1.66937e-12	4.41132e-09
PDK4	-3.87999	1.73457e-12	4.52558e-09
TOP2A	4.60289	1.91719e-12	4.93953e-09
EZH2	2.59713	2.10134e-12	5.34714e-09
C8orf79	-3.63922	2.1932e-12	5.51284e-09
THOC4	2.18236	2.32434e-12	5.77207e-09
KIF18B	4.12898	2.40733e-12	5.90699e-09
E2F1	2.85213	2.59623e-12	6.29555e-09
ZWINT	2.81372	2.7315e-12	6.54657e-09
NUF2	3.31183	2.94579e-12	6.96098e-09
MCM2	2.11119	2.97196e-12	6.96098e-09
PI15	-5.41389	3.11739e-12	7.21956e-09
ARHGAP11A	2.47341	3.37955e-12	7.73975e-09
CBX7	-2.03934	4.12542e-12	9.34408e-09
MRPL13	2.1704	4.25483e-12	9.50298e-09
KIF11	2.6295	4.28778e-12	9.50298e-09
CDC2	3.04447	4.38182e-12	9.60808e-09
FADS1	2.76562	5.45268e-12	1.18303e-08
CENPE	2.32108	5.58579e-12	1.19929e-08
GMPS	1.96969	6.7291e-12	1.42987e-08
CHL1	-2.96796	7.6749e-12	1.6142e-08
C13orf3	3.32203	8.17891e-12	1.70283e-08
EXO1	2.65353	9.15364e-12	1.88671e-08
POLQ	1.93171	9.34698e-12	1.90211e-08
MRPL47	2.39145	9.41297e-12	1.90211e-08
CCL28	-4.10307	9.68368e-12	1.9183e-08
PRDX4	1.96045	9.70367e-12	1.9183e-08
RECQL4	1.7965	9.77226e-12	1.9183e-08
KIF18A	3.33718	9.86888e-12	1.91899e-08
HMMR	4.03635	1.00866e-11	1.92739e-08
TP63	-4.58891	1.01615e-11	1.92739e-08
DTL	3.39354	1.01926e-11	1.92739e-08
HMGB3	2.76447	1.07677e-11	2.01262e-08
HIST1H2AD	2.1154	1.09777e-11	2.01262e-08
ANKRD30A	-6.37129	1.10368e-11	2.01262e-08
ZBTB4	-1.7269	1.10466e-11	2.01262e-08
MEG3	-1.09198	1.11316e-11	2.01262e-08
ZNF367	2.24126	1.21927e-11	2.18531e-08
TACC3	3.42512	1.25651e-11	2.23264e-08
EDN3	-4.80793	1.28262e-11	2.25955e-08
C12orf48	2.16047	1.32125e-11	2.29863e-08
HIST3H2A	1.6145	1.32711e-11	2.29863e-08
GRAMD3	-2.29161	1.51088e-11	2.59513e-08
PAR5	-3.1484	1.80147e-11	3.06868e-08
LRP8	3.53522	1.86966e-11	3.15873e-08
CENPK	2.40039	1.90608e-11	3.19408e-08
CKS1B	1.56527	1.98847e-11	3.30528e-08
ASF1B	1.47009	2.02942e-11	3.34636e-08
MCM10	2.83615	2.12819e-11	3.48137e-08
CSTB	2.15432	2.19427e-11	3.5612e-08
MND1	3.68063	2.24622e-11	3.61704e-08
GSTM2	-4.17153	2.5122e-11	4.01397e-08
EPR1	2.64977	2.5923e-11	4.1101e-08
ABCA5	-2.02109	2.68564e-11	4.22558e-08
LMNB1	4.1468	2.80402e-11	4.37843e-08
CLSPN	2.77336	3.03254e-11	4.69965e-08
LOC728264	-4.81935	3.20362e-11	4.92773e-08
PBK	3.64855	3.36118e-11	5.13178e-08
RAD51AP1	2.67335	3.66058e-11	5.54781e-08
TROAP	2.89623	4.36779e-11	6.5713e-08
CDCA8	3.49655	4.64275e-11	6.93435e-08
TMSB10	1.69297	4.82399e-11	7.15322e-08
ANO1	-3.22031	4.99693e-11	7.35674e-08
PSMD14	1.74893	5.83867e-11	8.53502e-08
GSG2	2.71415	6.78163e-11	9.83935e-08
HIST2H2AA4	2.60141	6.82641e-11	9.83935e-08
DST	-2.15447	7.31022e-11	1.04635e-07
HIST1H1D	2.12251	7.94567e-11	1.12947e-07
HIST1H2AL	2.26203	8.13704e-11	1.14875e-07
C5orf26	-1.80826	8.55137e-11	1.19903e-07
TPI1	1.63084	8.8043e-11	1.22615e-07
RAD51	2.85972	8.95062e-11	1.23816e-07
CDC6	2.99343	9.20198e-11	1.26445e-07
LOC100132116	-4.29565	9.32367e-11	1.27268e-07
PSMA7	1.71424	9.56243e-11	1.29669e-07
SEMA6D	-3.63847	1.03619e-10	1.39592e-07
TFDP3	2.68414	1.10062e-10	1.47308e-07
KLHL13	-4.55347	1.11398e-10	1.48135e-07
NDC80	3.65482	1.12345e-10	1.48436e-07
SLC25A5	1.14996	1.18739e-10	1.55885e-07
HOXA4	-3.88507	1.22012e-10	1.59168e-07
RBM5	-1.45308	1.24235e-10	1.60333e-07
GRPR	-2.59845	1.24461e-10	1.60333e-07
TK1	2.45783	1.2582e-10	1.61077e-07
TMEM132A	2.31421	1.2954e-10	1.64816e-07
TUBA1C	1.3781	1.39257e-10	1.75642e-07
SCGB1D1	-6.80839	1.39753e-10	1.75642e-07
MYH11	-3.70731	1.40929e-10	1.76046e-07
C16orf75	2.24941	1.52301e-10	1.89106e-07
SCGB1D2	-6.5651	1.6824e-10	2.07646e-07
ANKRA2	-1.55755	1.70058e-10	2.08641e-07
HMGB3L1	2.37132	1.86766e-10	2.27784e-07
HIST1H1E	1.94293	1.95057e-10	2.36496e-07
KIF15	2.21183	2.26253e-10	2.72715e-07
SCN2B	-4.27659	2.40041e-10	2.87652e-07
CDC7	2.16702	2.68379e-10	3.19752e-07
CNIH4	1.80276	2.78334e-10	3.29706e-07
STC2	-2.89451	2.94239e-10	3.46555e-07
SPAG5	2.79712	3.35835e-10	3.92911e-07
CBX3	1.02265	3.3741e-10	3.92911e-07
FAM33A	2.0365	3.4478e-10	3.99239e-07
FLJ11292	-1.54091	3.63673e-10	4.18763e-07
PER2	-1.58255	3.77448e-10	4.3221e-07
KIF14	3.01631	3.96781e-10	4.51838e-07
FADS2	4.07017	4.30821e-10	4.87906e-07
CCNA2	3.05239	4.6886e-10	5.28083e-07
SFRS5	-1.39048	4.81518e-10	5.39392e-07
WDR6	-1.068	5.34796e-10	5.95836e-07
CTHRC1	3.9691	5.39442e-10	5.9778e-07
PDGFA	-3.10944	5.73383e-10	6.31995e-07
DOCK1	-1.39907	5.83468e-10	6.3969e-07
S100P	4.55703	6.03172e-10	6.57794e-07
THBS2	2.6495	6.34341e-10	6.88144e-07
BUB1B	3.03932	6.49367e-10	7.00756e-07
WHSC1	1.49281	6.8581e-10	7.36229e-07
RP11-129H15.2	1.65656	7.06998e-10	7.54509e-07
EDA2R	-1.84464	7.10159e-10	7.54509e-07
CENPI	2.71362	7.33336e-10	7.75137e-07
KPNA2	1.56395	7.62559e-10	8.01913e-07
CKAP2	1.9198	7.71122e-10	8.06802e-07
HIST1H3I	2.52577	7.97989e-10	8.30696e-07
AK5	-3.26608	8.0486e-10	8.33638e-07
KIF13B	-1.85777	8.15441e-10	8.37133e-07
C6orf150	3.37807	8.18442e-10	8.37133e-07
SLC7A5	1.94129	8.20418e-10	8.37133e-07
TRIP13	2.13405	8.4821e-10	8.61227e-07
C1orf59	1.60203	8.5778e-10	8.66675e-07
LOC441795	1.91166	9.16396e-10	9.1877e-07
H2AFX	2.82186	9.18256e-10	9.1877e-07
CDCA7	2.88214	9.29497e-10	9.25524e-07
ZNF219	-1.83811	9.49169e-10	9.40568e-07
GRIA4	-2.4581	9.80065e-10	9.66538e-07
DDX17	-1.12307	9.98801e-10	9.80325e-07
LOC338579	-2.5783	1.04609e-09	1.02187e-06
CSE1L	1.38178	1.09027e-09	1.06001e-06
C16orf61	1.69093	1.10721e-09	1.07142e-06
WDHD1	2.25677	1.13351e-09	1.09174e-06
EFCAB1	-2.63367	1.1738e-09	1.12009e-06
E2F2	2.7573	1.2368e-09	1.17477e-06
GPR172A	1.23919	1.24725e-09	1.17926e-06
H2AFJ	1.12763	1.27956e-09	1.20427e-06
REEP5	-1.57917	1.28775e-09	1.20647e-06
FAM13B1	-1.44203	1.31117e-09	1.22286e-06
RANBP1	1.79542	1.48849e-09	1.3805e-06
CIT	2.4224	1.49359e-09	1.3805e-06
CX3CR1	-3.86824	1.50695e-09	1.38663e-06
HIST2H2AC	1.29225	1.5538e-09	1.42339e-06
CENPN	2.13624	1.59153e-09	1.4515e-06
DNAH5	-2.09667	1.63135e-09	1.48126e-06
VPS36	-1.44638	1.66603e-09	1.50611e-06
C6orf173	2.80139	1.80555e-09	1.62512e-06
HOXA2	-1.56471	1.8937e-09	1.69475e-06
NEDD4L	-2.58012	1.89936e-09	1.69475e-06
SAC3D1	1.50553	1.92999e-09	1.71465e-06
ZDHHC22	-1.17007	1.94881e-09	1.72394e-06
MCM4	2.70714	1.99343e-09	1.75588e-06
CAPN8	-3.60467	2.02458e-09	1.77573e-06
TCEAL7	-1.52641	2.11549e-09	1.84761e-06
HIST1H3H	1.29693	2.13873e-09	1.86002e-06
NRG1	-3.16988	2.20274e-09	1.90484e-06
UBE2S	1.50122	2.20875e-09	1.90484e-06
ECHDC2	-1.74797	2.27883e-09	1.95709e-06
LMNB2	1.69377	2.29295e-09	1.96105e-06
FOXP1	-1.61022	2.41171e-09	2.05409e-06
AURKA	2.60426	2.49029e-09	2.10468e-06
PSMB2	1.25986	2.49153e-09	2.10468e-06
ESR1	-3.27793	2.67212e-09	2.24403e-06
LOC646993	2.43916	2.67827e-09	2.24403e-06
KIF5C	-4.18081	2.77713e-09	2.31745e-06
APOD	-4.71995	2.79659e-09	2.32428e-06
IQCA1	-3.38357	2.87333e-09	2.37846e-06
CLK1	-1.27542	2.94407e-09	2.42227e-06
SCUBE2	-4.39193	2.95535e-09	2.42227e-06
CFL1	1.09291	2.96151e-09	2.42227e-06
C5orf4	-3.19756	2.9858e-09	2.43249e-06
NPY2R	-4.56194	3.03619e-09	2.46059e-06
MRPS17	1.79042	3.04417e-09	2.46059e-06
HIST1H4L	1.68046	3.1494e-09	2.5357e-06
TUBB	1.24674	3.2089e-09	2.57356e-06
CHEK1	2.78534	3.47676e-09	2.77092e-06
C13orf34	2.47518	3.49462e-09	2.77092e-06
NEK9	-1.21817	3.49532e-09	2.77092e-06
THSD4	-3.74842	3.5477e-09	2.80167e-06
SFRS18	-1.32453	3.57089e-09	2.80922e-06
TYMS	2.65604	3.6169e-09	2.8346e-06
MMRN2	-1.18285	3.98862e-09	3.10232e-06
MASP2	-2.27214	4.08454e-09	3.16499e-06
UFD1L	1.44415	4.41476e-09	3.40805e-06
PLK4	2.07476	4.594e-09	3.53319e-06
GLTSCR2	-1.47384	4.75704e-09	3.64497e-06
TMEM183B	1.36175	4.97678e-09	3.79922e-06
FGF1	-2.90331	4.99685e-09	3.80047e-06
LOC390705	-1.28792	5.03163e-09	3.81285e-06
MAD2L1	2.3189	5.15261e-09	3.89022e-06
DSN1	2.03618	5.23373e-09	3.92827e-06
TSHZ2	-3.45429	5.24111e-09	3.92827e-06
HSPE1	1.18145	5.67382e-09	4.23718e-06
ZC3H13	-1.18492	5.71084e-09	4.2427e-06
C4orf18	-3.56396	5.72239e-09	4.2427e-06
ATP9B	-1.45008	5.77625e-09	4.26729e-06
TCEB1P3	1.5041	6.01649e-09	4.4289e-06
H2AFV	1.05033	6.18054e-09	4.53346e-06
RBMS3	-2.7965	6.20411e-09	4.53461e-06
SHMT2	1.50186	6.23879e-09	4.54385e-06
ITIH5	-1.48552	6.35583e-09	4.6128e-06
FAM49B	1.59073	6.4402e-09	4.65763e-06
PKMYT1	1.92123	6.83647e-09	4.92693e-06
BTNL9	-2.6342	6.89984e-09	4.95527e-06
LOC203510	1.69029	7.2514e-09	5.17015e-06
PTTG2	2.18626	7.29125e-09	5.17015e-06
TALDO1	1.07271	7.29804e-09	5.17015e-06
OR5P3	-3.46192	7.29938e-09	5.17015e-06
LAGE3	1.98678	7.47192e-09	5.27407e-06
MTHFD2	1.58867	7.49727e-09	5.27407e-06
TPM3	1.04745	8.02015e-09	5.61712e-06
LRIG1	-2.2324	8.03943e-09	5.61712e-06
LOC161527	-1.65045	8.32067e-09	5.79398e-06
HMGCS2	-4.85157	8.54134e-09	5.92761e-06
DMD	-2.60545	8.64944e-09	5.98249e-06
NUDT1	1.50496	8.70413e-09	6.00018e-06
ATP6AP2	1.28945	8.77878e-09	6.03147e-06
BDH2	-1.41667	8.84648e-09	6.05779e-06
MRPL19	1.34571	9.11142e-09	6.21856e-06
STMN1	2.14079	9.19767e-09	6.2567e-06
GTPBP4	1.50066	9.37269e-09	6.35478e-06
FGF14	-2.95007	9.43646e-09	6.37705e-06
LSM4	1.3336	9.49222e-09	6.39377e-06
GEN1	1.8431	9.66339e-09	6.46791e-06
DDX39	1.81209	9.66506e-09	6.46791e-06
WSB1	-1.26689	9.90969e-09	6.61016e-06
EMILIN3	-1.27117	1.04741e-08	6.96411e-06
NTN4	-3.5059	1.05465e-08	6.98967e-06
SRPK1	1.1936	1.10594e-08	7.30616e-06
C14orf25	-2.45774	1.12069e-08	7.37993e-06
BLM	2.652	1.14675e-08	7.5275e-06
ODZ2	-2.71104	1.15739e-08	7.56984e-06
UBQLN1	1.0067	1.1656e-08	7.56984e-06
SQLE	2.22883	1.16651e-08	7.56984e-06
ENY2	1.50814	1.16789e-08	7.56984e-06
PLK1	2.24118	1.17965e-08	7.62205e-06
FLJ32679	-1.47075	1.20311e-08	7.73024e-06
CACNA1D	-1.7849	1.20389e-08	7.73024e-06
RACGAP1P	1.30754	1.2307e-08	7.87783e-06
GGH	2.94054	1.2641e-08	8.06657e-06
DIAPH3	2.79824	1.2785e-08	8.13326e-06
RHD	-2.0795	1.32284e-08	8.36723e-06
IQUB	-2.25237	1.32679e-08	8.36723e-06
C15orf42	1.80279	1.32745e-08	8.36723e-06
PIR	2.10371	1.35179e-08	8.47013e-06
ATAD2	2.3996	1.352e-08	8.47013e-06
ZNF506	-1.03702	1.39152e-08	8.69133e-06
HNRPDL	-1.11616	1.41715e-08	8.82463e-06
UTRN	-1.55765	1.44585e-08	8.97623e-06
GOLGA8A	-1.54774	1.55895e-08	9.6216e-06
COX7B	1.25441	1.56036e-08	9.6216e-06
MPHOSPH9	1.39748	1.56611e-08	9.6216e-06
DLGAP5	2.43759	1.56847e-08	9.6216e-06
LOC100128180	-1.05604	1.57367e-08	9.62488e-06
DNALI1	-4.48983	1.58522e-08	9.6668e-06
MGEA5	-1.06274	1.59047e-08	9.66777e-06
SUV39H2	1.85109	1.59738e-08	9.66777e-06
IP6K2	-1.20717	1.59945e-08	9.66777e-06
CHAF1B	2.39532	1.607e-08	9.685e-06
COX6B1	1.07422	1.64131e-08	9.81174e-06
BMS1P5	-1.29448	1.64673e-08	9.81174e-06
LOC100132658	-1.036	1.64707e-08	9.81174e-06
C2orf40	-2.5103	1.67263e-08	9.9353e-06
BOLA3	1.38266	1.71731e-08	1.01215e-05
CHRNA5	2.63532	1.71872e-08	1.01215e-05
TIMELESS	1.53533	1.72431e-08	1.01256e-05
KIFC1	2.3931	1.7453e-08	1.02197e-05
TIMM8A	1.83864	1.77065e-08	1.02855e-05
SLC16A3	3.04635	1.77152e-08	1.02855e-05
TUB	-1.26907	1.78189e-08	1.03167e-05
GUK1	1.23405	1.80779e-08	1.04373e-05
SLC3A2	1.2372	1.81936e-08	1.04748e-05
SLC27A6	-3.47948	1.85603e-08	1.06562e-05
C9orf40	1.93736	1.88406e-08	1.07778e-05
GCUD2	2.61452	1.88888e-08	1.07778e-05
ASPN	2.45849	1.89291e-08	1.07778e-05
CYCS	1.08541	1.92432e-08	1.09265e-05
TRIM59	2.30767	1.97708e-08	1.11952e-05
FAM64A	2.89884	1.98896e-08	1.12317e-05
PPP1R14B	1.43183	1.99783e-08	1.12509e-05
RP13-401N8.2	-1.28381	2.00861e-08	1.12808e-05
HIST1H3C	1.51115	2.09197e-08	1.16853e-05
CORIN	-1.08012	2.12243e-08	1.18234e-05
CD99	1.89373	2.1312e-08	1.18403e-05
CDC25A	2.16078	2.15769e-08	1.19552e-05
ARHGAP19	-1.99661	2.17882e-08	1.20399e-05
KIAA0484	-2.13549	2.18502e-08	1.20419e-05
HOMER3	1.91488	2.30493e-08	1.26016e-05
NDUFAB1	1.2138	2.31632e-08	1.26304e-05
HIST1H4F	1.38744	2.38137e-08	1.29508e-05
PCNA	1.84297	2.39431e-08	1.29869e-05
NRG2	-2.637	2.4126e-08	1.30518e-05
C13orf27	2.35409	2.44329e-08	1.31832e-05
CKAP5	1.40147	2.45024e-08	1.31862e-05
CTPS	2.53223	2.45707e-08	1.31886e-05
ECE2	1.74893	2.46678e-08	1.32063e-05
ANAPC11	1.35386	2.48114e-08	1.32487e-05
CDKN2A	3.19739	2.52389e-08	1.34422e-05
ELF4	2.09995	2.65019e-08	1.40442e-05
TRIM66	-1.78809	2.65093e-08	1.40442e-05
LOC283174	-2.91534	2.72125e-08	1.4345e-05
HIST1H3G	1.29852	2.81172e-08	1.47842e-05
CDCA2	2.39901	2.89131e-08	1.51639e-05
C6orf115	1.70684	2.92374e-08	1.52951e-05
TMEM70	1.63867	2.95753e-08	1.54327e-05
BOLA2B	1.53086	3.08988e-08	1.60826e-05
LOC100128979	-2.77091	3.12539e-08	1.62265e-05
ZC3H6	-1.92854	3.22188e-08	1.66658e-05
KLB	-1.18645	3.22617e-08	1.66658e-05
SYNPO2	-2.23162	3.34631e-08	1.71695e-05
LDHA	1.25915	3.35535e-08	1.71695e-05
BOP1	1.64008	3.4078e-08	1.73861e-05
ERBB4	-3.83173	3.42965e-08	1.74544e-05
TOR3A	1.36877	3.49103e-08	1.7723e-05
LOC399959	-3.56865	3.56111e-08	1.80182e-05
COX8A	1.35294	3.56665e-08	1.80182e-05
PDXDC1	1.67562	3.59202e-08	1.8102e-05
NP	2.05008	3.80224e-08	1.91146e-05
SOAT1	1.82261	3.84648e-08	1.929e-05
SLC2A4RG	1.06777	3.90687e-08	1.95453e-05
LPCAT2	-2.10347	3.93045e-08	1.96156e-05
MCM6	1.77312	3.94244e-08	1.9628e-05
C19orf53	1.88301	3.96313e-08	1.96834e-05
EPRS	1.44815	4.01648e-08	1.99004e-05
DYNLRB2	-3.14977	4.16345e-08	2.05727e-05
SGOL2	2.47816	4.17213e-08	2.05727e-05
RTKN2	2.13073	4.22658e-08	2.07915e-05
ZNF501	-1.29494	4.24436e-08	2.08292e-05
GJB2	3.42168	4.44043e-08	2.17397e-05
ACP5	-1.05667	4.48217e-08	2.18501e-05
DHCR7	2.60078	4.48418e-08	2.18501e-05
YEATS2	1.76703	4.62836e-08	2.23684e-05
NEK10	-4.43288	4.63946e-08	2.23684e-05
CYP2B6	-1.12007	4.65406e-08	2.23684e-05
LOC285216	1.40361	4.65567e-08	2.23684e-05
FANK1	-2.46182	4.7469e-08	2.27537e-05
ACTA2	-3.24365	4.81177e-08	2.30083e-05
LENG8	-1.16721	4.82234e-08	2.30083e-05
TOMM5	1.56975	4.86997e-08	2.31819e-05
PLOD2	2.46509	5.00936e-08	2.37905e-05
DONSON	1.78132	5.07381e-08	2.3977e-05
TIMM17A	1.29696	5.08353e-08	2.3977e-05
TDP1	1.73343	5.18567e-08	2.44029e-05
ZNF154	-2.06192	5.20944e-08	2.44438e-05
ARHGAP20	-1.75461	5.22507e-08	2.44438e-05
SEC31B	-1.95479	5.2352e-08	2.44438e-05
SLC2A1	2.33804	5.24181e-08	2.44438e-05
MME	-2.48929	5.25936e-08	2.44703e-05
HEMK1	-1.42233	5.28229e-08	2.45216e-05
COL14A1	-2.62732	5.41475e-08	2.50238e-05
CDCA4	1.71484	5.45694e-08	2.51062e-05
SEMA5A	-2.79437	5.49192e-08	2.52109e-05
NRSN1	-2.35831	5.51436e-08	2.52577e-05
C16orf59	1.67267	5.73862e-08	2.61685e-05
PAICS	1.10906	5.77708e-08	2.62858e-05
FANCA	2.89573	5.80094e-08	2.63362e-05
LOC728198	1.54406	5.84525e-08	2.6479e-05
ADAMTS5	-2.80411	5.88075e-08	2.65814e-05
LOC54492	2.12783	5.9217e-08	2.67079e-05
GRAMD1C	-2.37019	5.94887e-08	2.67719e-05
SCYE1	-1.18879	6.0077e-08	2.69702e-05
PMCHL1	2.21449	6.01911e-08	2.69702e-05
FUCA2	1.47173	6.04611e-08	2.70324e-05
SNAI2	-1.40633	6.06203e-08	2.7045e-05
PFDN2	1.59274	6.15453e-08	2.73983e-05
NCAPG2	2.07913	6.20859e-08	2.75794e-05
MRPL14	1.17078	6.40304e-08	2.83772e-05
CYP1A2	-1.03847	6.41572e-08	2.83772e-05
DCDC2	-3.36311	6.43056e-08	2.83819e-05
PFDN6	1.60005	6.48694e-08	2.85696e-05
SAE1	1.31945	6.53539e-08	2.86605e-05
NRIP2	-1.12308	6.65781e-08	2.90736e-05
RHOT1	-1.3382	6.76145e-08	2.94638e-05
GPR81	-4.05133	6.86078e-08	2.98336e-05
TIMM23	1.25399	6.91004e-08	2.99845e-05
CDKN2C	2.25953	6.95013e-08	3.00951e-05
PIGR	-5.6223	7.02314e-08	3.03475e-05
KDELR2	1.13077	7.21567e-08	3.10493e-05
DPH2	1.56837	7.27279e-08	3.12299e-05
RBL1	1.89769	7.44126e-08	3.18586e-05
COX17	1.33188	7.45014e-08	3.18586e-05
PSMD8	1.2741	7.73564e-08	3.29428e-05
CCDC155	-1.43192	8.00665e-08	3.39566e-05
TOMM22	1.64358	8.26796e-08	3.49929e-05
EIF4B	-1.12885	8.51265e-08	3.59547e-05
GADD45GIP1	1.12282	8.66267e-08	3.64389e-05
ZIC1	4.04466	8.75669e-08	3.66789e-05
HIST1H4C	1.61619	8.76436e-08	3.66789e-05
RUFY2	-1.22287	8.78623e-08	3.66789e-05
SPARCL1	-3.37581	8.79089e-08	3.66789e-05
MEIS3P1	-1.87504	8.93957e-08	3.72239e-05
CENPM	2.35694	8.97473e-08	3.72949e-05
CXCL2	-2.45802	9.0701e-08	3.76154e-05
MGC12935	2.72297	9.1272e-08	3.77762e-05
RBM8A	1.12703	9.20676e-08	3.80292e-05
E2F3	1.77086	9.26313e-08	3.81224e-05
LOC100130518	-1.08656	9.26634e-08	3.81224e-05
ILF2	1.51294	9.35743e-08	3.84205e-05
DEPDC1B	2.44375	9.42582e-08	3.86244e-05
MASTL	1.87926	1.00599e-07	4.10592e-05
AMIGO2	-3.37347	1.01801e-07	4.14677e-05
SNRPN	-2.33061	1.02732e-07	4.17646e-05
ACADVL	-1.1957	1.03729e-07	4.20871e-05
SLC35A2	1.12036	1.07594e-07	4.35695e-05
PIP	-6.36025	1.08161e-07	4.37132e-05
WDSOF1	1.61414	1.11008e-07	4.46011e-05
PSMD12	1.0119	1.11772e-07	4.48209e-05
ARHGDIA	1.43261	1.12559e-07	4.50487e-05
TSPAN1	-1.10336	1.1282e-07	4.50658e-05
ATP1B3	1.93121	1.16431e-07	4.64181e-05
KCNJ16	-3.17058	1.16723e-07	4.64305e-05
COX6B2	-1.2964	1.16912e-07	4.64305e-05
IL33	-3.25652	1.17761e-07	4.66776e-05
NTRK2	-4.06361	1.24082e-07	4.90888e-05
PLCH1	2.3324	1.2449e-07	4.91557e-05
AFAP1L2	-2.04798	1.25545e-07	4.94777e-05
RBM43	-1.74728	1.25932e-07	4.95353e-05
C9orf61	-2.73289	1.2686e-07	4.97406e-05
TIPIN	2.28686	1.26937e-07	4.97406e-05
LOC91316	-1.02372	1.27907e-07	5.00258e-05
C1orf31	1.2915	1.29952e-07	5.07294e-05
SMC6	1.70129	1.31589e-07	5.12713e-05
ARL6IP1	1.15941	1.32854e-07	5.16665e-05
RBX1	1.26822	1.33183e-07	5.16892e-05
DGKH	1.34923	1.33414e-07	5.16892e-05
C15orf23	1.92702	1.33707e-07	5.16912e-05
LOC100128266	1.46025	1.33921e-07	5.16912e-05
PYCR1	1.71227	1.34247e-07	5.17204e-05
WBSCR23	-1.01303	1.34784e-07	5.18302e-05
IGJ	-3.57819	1.35826e-07	5.21339e-05
DKK3	-2.64079	1.42008e-07	5.43045e-05
LOC284112	-2.68283	1.43746e-07	5.48054e-05
LOC100131482	1.28233	1.4385e-07	5.48054e-05
SDC1	2.06192	1.46151e-07	5.55792e-05
TTYH3	2.17152	1.46765e-07	5.57098e-05
FAM152B	1.22874	1.48254e-07	5.61719e-05
KPNA4	1.24956	1.49132e-07	5.63651e-05
LOC389842	1.87112	1.49311e-07	5.63651e-05
XBP1	-1.77458	1.49675e-07	5.63992e-05
FAM96B	1.32158	1.50453e-07	5.65889e-05
SCD	2.52091	1.53182e-07	5.74853e-05
FEN1	1.52915	1.53394e-07	5.74853e-05
BXDC2	1.27145	1.56861e-07	5.86779e-05
LOC285944	-4.27351	1.61191e-07	6.01881e-05
ASB9	2.10452	1.62695e-07	6.05947e-05
ABCA11P	-2.00495	1.62867e-07	6.05947e-05
LBR	1.62314	1.69144e-07	6.27037e-05
AFF3	-2.59996	1.69501e-07	6.27231e-05
NOP10	1.05252	1.70965e-07	6.30585e-05
FTO	-1.86929	1.71019e-07	6.30585e-05
HOXA7	-4.01956	1.71616e-07	6.31657e-05
MMP11	3.06379	1.73693e-07	6.37561e-05
LAPTM4B	1.46028	1.75878e-07	6.43892e-05
GART	1.22149	1.76836e-07	6.4625e-05
AGTR1	-1.80621	1.78767e-07	6.52152e-05
AHSA2	-1.32283	1.80673e-07	6.57941e-05
NDUFA6	1.38199	1.87478e-07	6.80317e-05
CMYA5	-2.22081	1.89177e-07	6.85015e-05
SMA4	-1.40438	1.89437e-07	6.85015e-05
TMEM144	-2.28544	1.93762e-07	6.99427e-05
HIST1H2BK	2.53427	1.94304e-07	7.00156e-05
SCN4B	-3.42466	1.94793e-07	7.00694e-05
RFC4	1.80401	1.96805e-07	7.0579e-05
LOC729983	2.12548	1.97054e-07	7.0579e-05
DCK	1.40279	1.97237e-07	7.0579e-05
VAV2	1.0194	1.98957e-07	7.10594e-05
PDZD11	1.19109	1.99269e-07	7.10594e-05
GSTM1	-1.97281	2.00098e-07	7.12319e-05
BCL2	-2.05232	2.00982e-07	7.14233e-05
CIRBP	-1.60157	2.10548e-07	7.41885e-05
GPRASP1	-2.53266	2.10563e-07	7.41885e-05
HBA1	-1.64878	2.11852e-07	7.45151e-05
PARP1	1.44263	2.15853e-07	7.5793e-05
PMCH	1.98464	2.22347e-07	7.78085e-05
LOC100170939	-1.72843	2.30555e-07	8.04077e-05
LOC349196	-1.56848	2.3244e-07	8.07915e-05
PTHLH	-3.0289	2.35871e-07	8.18463e-05
AMY2B	-1.54667	2.38674e-07	8.26796e-05
IL11RA	-1.43289	2.42549e-07	8.38779e-05
GNG5	1.14544	2.42947e-07	8.38779e-05
SMARCC2	-1.04651	2.4475e-07	8.43592e-05
FLJ25770	-1.71665	2.4895e-07	8.56635e-05
ZNF695	1.37023	2.51264e-07	8.63154e-05
HSPA14	1.2351	2.57424e-07	8.82846e-05
NAP1L2	-2.0508	2.58091e-07	8.83664e-05
RPL39L	2.35074	2.58773e-07	8.84528e-05
TCEB2	1.00854	2.60632e-07	8.88537e-05
PIM1	1.99729	2.60808e-07	8.88537e-05
ROBO3	-2.23244	2.62496e-07	8.92811e-05
IRS1	-2.75435	2.69467e-07	9.12424e-05
LOC342994	-1.0334	2.6959e-07	9.12424e-05
KIAA1217	-1.36405	2.76913e-07	9.34142e-05
VBP1	1.57494	2.79343e-07	9.40798e-05
CORO2B	-1.43502	2.79903e-07	9.41145e-05
GNB4	1.34411	2.84311e-07	9.52859e-05
MEX3A	2.5321	2.87773e-07	9.5956e-05
MAPT	-2.51603	2.87995e-07	9.5956e-05
HPRT1	1.28227	2.88173e-07	9.5956e-05
LIMK1	1.70877	2.89814e-07	9.63468e-05
SF3B14	1.23055	2.91395e-07	9.67165e-05
STIP1	1.29144	2.94343e-07	9.72254e-05
CCNE2	2.69309	2.96337e-07	9.77275e-05
C21orf34	-2.01415	3.00006e-07	9.87794e-05
LOC201229	-2.01579	3.00992e-07	9.89458e-05
UQCRH	1.36727	3.02557e-07	9.90718e-05
CSRP1	-1.44563	3.02568e-07	9.90718e-05
KIF16B	-1.6402	3.02817e-07	9.90718e-05
BARD1	1.52653	3.03903e-07	9.92694e-05
STRA13	1.49335	3.05555e-07	9.95467e-05
KCNC2	-2.18998	3.05717e-07	9.95467e-05
TUBB3	1.97844	3.07332e-07	9.99145e-05
PKD1	-1.44384	3.09394e-07	0.000100379
PLK2	-2.18511	3.09735e-07	0.000100379
GOLGA8E	-1.54048	3.26416e-07	0.000105288
LIFR	-2.85223	3.28465e-07	0.000105784
TMEM48	1.30826	3.43372e-07	0.000109866
LOC284232	-2.18864	3.43807e-07	0.000109866
RNASEH2A	1.34136	3.50792e-07	0.000111925
AKAP11	-1.06445	3.54282e-07	0.00011269
TAT	-3.23708	3.58735e-07	0.00011393
SETDB2	-1.15304	3.59339e-07	0.000113946
XPOT	1.26204	3.62e-07	0.000114614
ZUFSP	1.56498	3.63268e-07	0.000114839
NBR2	-1.01672	3.66073e-07	0.000115378
LHFP	-1.56674	3.66546e-07	0.000115378
RAI2	-3.74431	3.66653e-07	0.000115378
TCEB1	1.22912	3.72769e-07	0.000116946
CARHSP1	1.51988	3.76057e-07	0.000117681
NXT1	1.3398	3.76254e-07	0.000117681
PPP1R12B	-1.36518	3.79046e-07	0.000118374
BEX1	-3.11617	3.81216e-07	0.000118872
CHAF1A	1.92608	3.86821e-07	0.000120256
RMI1	1.55927	3.90105e-07	0.000121094
PDCD5	1.38728	3.91846e-07	0.000121452
WDR34	1.29498	3.9909e-07	0.000123511
UCHL5	1.21203	4.03903e-07	0.000124814
CD200	-2.61958	4.07048e-07	0.000125597
LOC727835	-1.1047	4.18793e-07	0.000129028
TBRG1	-1.39699	4.1997e-07	0.000129197
C1orf122	1.42526	4.20986e-07	0.000129317
KIAA1602	-1.11561	4.29725e-07	0.000131805
FAM129A	-1.76294	4.33045e-07	0.000132626
CCDC39	-1.21794	4.35006e-07	0.000133029
ESCO2	2.16297	4.41704e-07	0.000134504
NAV3	-2.71652	4.41787e-07	0.000134504
RPA3	1.46582	4.43906e-07	0.000134826
FOXK2	1.72042	4.47029e-07	0.000135499
TOM1L2	-1.6588	4.63066e-07	0.000139949
SMYD1	-2.22191	4.64064e-07	0.000140045
CEBPG	1.4063	4.72272e-07	0.000142314
PGK1	1.15851	4.87854e-07	0.000146154
ALDH7A1	-1.33818	4.89928e-07	0.000146563
C1orf226	-1.69634	4.92728e-07	0.000147187
GPR126	1.55539	4.96455e-07	0.000147871
PSMA4	1.1755	4.98557e-07	0.000148283
CCNB2	1.46519	4.99725e-07	0.000148416
MARCH8	1.63472	5.09464e-07	0.000150808
CLK4	-1.30696	5.09519e-07	0.000150808
CDKN2D	2.15462	5.09973e-07	0.000150808
COX6A1	1.20178	5.18395e-07	0.000153079
KIAA0329	-1.95104	5.22974e-07	0.00015421
NAIP	-1.45914	5.24787e-07	0.000154303
HIST1H4I	1.07988	5.31881e-07	0.000155546
TMEM65	1.53242	5.32622e-07	0.000155546
LRRC59	1.40426	5.32917e-07	0.000155546
TNS1	-1.63482	5.3354e-07	0.000155546
ZWILCH	2.27398	5.35665e-07	0.000155944
ARPC5L	1.57432	5.37205e-07	0.000156172
LOC100128364	-2.55328	5.49322e-07	0.00015947
BCL2A1	1.7962	5.55332e-07	0.000160988
TTC13	1.96332	5.56569e-07	0.00016112
GLT25D1	1.94205	5.71976e-07	0.000164885
CHML	2.15186	5.7876e-07	0.000166509
SAMD5	-3.58097	5.79226e-07	0.000166509
TCF19	1.7825	5.80488e-07	0.000166587
HS3ST4	-3.77146	5.81759e-07	0.000166587
SCGB2A2	-6.22174	5.81919e-07	0.000166587
GATA3	-2.91765	5.87338e-07	0.000167548
CCDC122	-1.67562	5.94623e-07	0.000169283
GPI	1.15647	6.0328e-07	0.000171511
ZC3H18	1.75426	6.07105e-07	0.00017236
KIAA1524	1.98022	6.12298e-07	0.000173595
CCT5	1.41973	6.13909e-07	0.000173813
CCDC99	1.36433	6.20043e-07	0.000175111
HMX2	-1.01103	6.20733e-07	0.000175111
SEMA6A	-1.11604	6.2104e-07	0.000175111
CNN1	-3.11614	6.24618e-07	0.000175879
CXorf61	3.35115	6.26789e-07	0.000176009
LTBP2	-2.90095	6.29434e-07	0.000176511
USP34	-1.02504	6.33029e-07	0.000177219
GUSBL2	-1.12619	6.33678e-07	0.000177219
NUDT19	1.45744	6.34629e-07	0.000177245
CEP68	-1.31623	6.3615e-07	0.000177429
CACNA1C	-2.07653	6.39572e-07	0.000178143
FAM123B	1.6103	6.42446e-07	0.000178702
HSPB11	1.13887	6.50334e-07	0.000180513
LRRC37B2	-1.09122	6.52366e-07	0.000180513
IRX3	-1.23613	6.52462e-07	0.000180513
CEP76	2.00354	6.55481e-07	0.000181105
NCRNA00081	-1.30927	6.63704e-07	0.000183132
SPATA18	-2.66933	6.69289e-07	0.000184426
PRIM2	1.50863	6.7369e-07	0.000185391
GGCT	1.1464	6.84565e-07	0.000187882
PGR	-2.77212	6.98497e-07	0.000191196
LSM7	1.22708	6.996e-07	0.000191244
DOLK	2.43738	7.02531e-07	0.000191538
UBL5	1.07078	7.06112e-07	0.000192006
IGBP1	-1.03613	7.15161e-07	0.000193955
LOC285535	-1.97945	7.23531e-07	0.00019571
C1orf43	1.18424	7.28941e-07	0.000196915
C13orf37	1.24104	7.369e-07	0.000198804
MAMDC2	-2.60147	7.39576e-07	0.000199011
HLTF	1.15661	7.39744e-07	0.000199011
ITM2B	-1.24284	7.45294e-07	0.000200021
ALG3	1.20535	7.5365e-07	0.000202001
RAN	1.02766	7.61948e-07	0.000203432
WSB2	1.32412	7.79677e-07	0.000207896
SHFM1	1.08905	7.87385e-07	0.000209409
NECAB1	-1.84872	7.90332e-07	0.000209922
CBS	2.16983	7.94605e-07	0.000210785
ASAP1	1.82325	8.01791e-07	0.000212418
HIST1H4H	1.1597	8.09929e-07	0.000214299
RABIF	1.45504	8.21846e-07	0.000217173
ATP5J2	1.12447	8.24829e-07	0.000217574
SH3BGRL	-1.41675	8.25474e-07	0.000217574
LOC729595	1.74226	8.37397e-07	0.000220153
INCENP	2.22697	8.5244e-07	0.000223538
ACADSB	-2.27489	8.61209e-07	0.000225551
LOC442308	1.19108	8.68467e-07	0.000226875
LIN9	1.66019	8.69948e-07	0.000226974
CDO1	-3.29858	8.79732e-07	0.000228881
ZNF397OS	-1.01818	8.8074e-07	0.000228881
PRICKLE2	-2.00601	8.81698e-07	0.000228881
C14orf132	-1.92206	8.835e-07	0.00022906
SLC35B1	1.14033	8.94275e-07	0.000230982
FLJ43276	-1.23777	9.0104e-07	0.000232195
MSH2	1.36985	9.01223e-07	0.000232195
FMO5	-2.61207	9.05708e-07	0.000232977
SLC26A3	-2.22724	9.06519e-07	0.000232977
HIST2H4B	1.09613	9.11851e-07	0.000234055
COX5A	1.13588	9.18364e-07	0.000235434
CCDC109B	1.74989	9.255e-07	0.000236969
PRX	-1.11396	9.37432e-07	0.000239649
CKAP2L	1.8934	9.38296e-07	0.000239649
BMP2K	-1.50404	9.42924e-07	0.000240533
SEC61G	1.53833	9.44749e-07	0.000240701
C6orf125	1.34273	9.52968e-07	0.000242495
ITM2A	-2.8237	9.65608e-07	0.000245107
PRKD1	-2.3078	9.69947e-07	0.000245905
PURA	-1.21982	9.78143e-07	0.000247374
KIR3DL3	-1.00738	9.86151e-07	0.000249094
TMEM26	-1.52955	9.94004e-07	0.000250513
CALR	1.40603	9.94198e-07	0.000250513
PPM1G	1.45772	9.9619e-07	0.000250708
RERG	-2.60414	1.00467e-06	0.000252533
NTF4	-2.46936	1.02052e-06	0.000256206
MGST3	1.09129	1.02508e-06	0.000257038
OPRL1	-1.03055	1.04726e-06	0.000261961
ZNF214	-2.11505	1.05559e-06	0.000263724
IL20RA	-3.76859	1.06519e-06	0.000265802
ARL4A	-2.11942	1.07545e-06	0.000268038
LOC100131336	1.23628	1.07803e-06	0.000268356
TMEM38B	1.37335	1.09457e-06	0.000271729
NUP155	1.54406	1.09458e-06	0.000271729
PPIL5	1.63335	1.09554e-06	0.000271729
MRPL11	1.536	1.11378e-06	0.000275668
LOC492311	-1.52194	1.11409e-06	0.000275668
EIF2C2	1.47279	1.1188e-06	0.000276501
MDK	2.16602	1.12321e-06	0.000277258
IL4I1	2.97352	1.12779e-06	0.000277723
DNAJB11	1.34341	1.13662e-06	0.000279231
MFN1	1.02683	1.13804e-06	0.000279247
HOXA5	-2.4268	1.14306e-06	0.000280146
GOLSYN	-2.58249	1.14916e-06	0.000281306
MAGI1	-1.74213	1.15317e-06	0.000281951
WIF1	-5.07102	1.15905e-06	0.000282731
KCNMA1	-1.67141	1.1591e-06	0.000282731
NEIL1	-2.28903	1.17753e-06	0.000286821
ZNF224	-1.40527	1.17865e-06	0.000286821
HELLS	1.96118	1.18681e-06	0.000288467
BRI3BP	1.53751	1.20406e-06	0.000292314
POTEC	-2.60645	1.21335e-06	0.000294223
STK38	1.38888	1.22312e-06	0.000294878
C1orf63	-1.01021	1.22502e-06	0.000294878
CHEK2	1.84582	1.22524e-06	0.000294878
NDUFB11	1.01292	1.23543e-06	0.000296784
POLR2K	1.10514	1.24615e-06	0.000298663
DNMT3A	1.0764	1.24797e-06	0.000298753
GLDC	2.95762	1.25936e-06	0.000301129
MYBPC1	-3.86666	1.27837e-06	0.00030532
METRNL	1.53099	1.28318e-06	0.000306114
XRCC2	2.15478	1.29184e-06	0.000307824
HIST1H1A	2.60019	1.30434e-06	0.000310443
TBC1D9	-2.81584	1.32417e-06	0.000314801
NUDCD1	2.02807	1.34244e-06	0.000318775
MRPS15	1.09816	1.35117e-06	0.00032048
TMEM165	1.00052	1.35453e-06	0.000320908
EFHA2	-1.72314	1.36311e-06	0.00032257
LAMB2	-1.4412	1.38027e-06	0.000326254
SSX2IP	1.64625	1.38398e-06	0.000326759
GUSBL1	-1.16358	1.40664e-06	0.000331348
GEMIN6	1.34907	1.43969e-06	0.000338362
FAM47E	-3.04482	1.46979e-06	0.000344904
HDGF	1.3333	1.47088e-06	0.000344904
PPIL1	1.61486	1.50563e-06	0.000352252
MCM3	1.26004	1.50846e-06	0.000352513
GGTA1	-1.32113	1.51215e-06	0.000352976
GTSE1	1.13517	1.53589e-06	0.000358112
FANCD2	1.42148	1.5381e-06	0.00035822
N4BP2L1	-2.41143	1.55837e-06	0.000361716
PSMG1	1.00494	1.57189e-06	0.000364444
MGP	-2.72767	1.58232e-06	0.000366451
RBPMS	-2.2049	1.58538e-06	0.000366746
MYST2	-1.10906	1.59091e-06	0.000367202
EBP	1.43488	1.59771e-06	0.000368359
CCNG2	-1.35269	1.59971e-06	0.000368408
MLPH	-3.19042	1.61202e-06	0.000370829
DTYMK	1.29257	1.64637e-06	0.000377886
CLSTN2	-3.4983	1.66163e-06	0.000380965
SHC2	-1.24837	1.67089e-06	0.000382663
RNPC3	-1.05737	1.67276e-06	0.000382666
CRLS1	1.08258	1.68295e-06	0.000384144
ADAMDEC1	3.67551	1.68702e-06	0.000384647
DPH3	1.26143	1.69291e-06	0.000385564
DMRTC1	-1.92545	1.70298e-06	0.000387428
LRP2BP	-1.62382	1.71318e-06	0.00038889
LOC158863	-1.29212	1.74591e-06	0.000395885
SLC7A14	-1.41989	1.76323e-06	0.000398698
YWHAZ	1.07932	1.76691e-06	0.00039889
FOXN2	1.58358	1.79123e-06	0.000403498
ELA1	-1.03281	1.80066e-06	0.000404862
D2HGDH	-1.20491	1.80267e-06	0.000404862
LOC100128663	-2.04802	1.80318e-06	0.000404862
DSCC1	2.46701	1.8153e-06	0.00040714
DDA1	1.01854	1.86058e-06	0.000415936
RHBDF2	1.8273	1.90692e-06	0.000425834
MYH3	-2.24264	1.94059e-06	0.000432885
EIF4E2	1.44257	1.95017e-06	0.000434551
SCN7A	-1.44615	1.97503e-06	0.000439616
TARS	1.32409	1.98499e-06	0.000441357
RERE	-1.53589	1.9916e-06	0.000442349
ATP1A2	-2.92174	2.0146e-06	0.000446975
PDE1C	-2.23449	2.02744e-06	0.00044934
JMJD7	-1.50756	2.03278e-06	0.00045004
LAMA3	-2.59344	2.03866e-06	0.000450857
PGM2	1.57665	2.04813e-06	0.000452466
NR3C1	-1.67121	2.09228e-06	0.000461231
TPTE	-1.75298	2.11046e-06	0.000464246
KNTC1	1.42659	2.11935e-06	0.000465705
INPP4B	-2.53202	2.12558e-06	0.00046608
MAP3K1	-1.43489	2.13518e-06	0.000467686
ELOVL1	1.48231	2.16756e-06	0.00047327
PTN	-3.95516	2.18307e-06	0.000476152
PDCD4	-1.36022	2.19893e-06	0.000479104
CPN2	-1.04449	2.2154e-06	0.000481675
ZNF280D	-1.18124	2.2191e-06	0.00048197
GPSM2	2.05348	2.22763e-06	0.000483313
PSMD2	1.5979	2.23387e-06	0.000484159
DIXDC1	-1.82104	2.23685e-06	0.000484295
PRKDC	1.04255	2.24107e-06	0.000484699
AP2M1	1.19677	2.24495e-06	0.000485031
SLC25A27	-1.41104	2.24923e-06	0.000485054
ITGBL1	-2.55122	2.24977e-06	0.000485054
POTEB	-3.36959	2.26771e-06	0.000488412
HSD17B8	-1.12809	2.28174e-06	0.000490921
MYD88	1.6315	2.30928e-06	0.000496098
C5orf41	-1.91855	2.31062e-06	0.000496098
ANGPTL7	-1.83281	2.31803e-06	0.00049717
DMXL1	-1.00152	2.34718e-06	0.0005029
CATSPER2	-1.57975	2.37919e-06	0.000509228
MLF1	1.63013	2.42455e-06	0.000518399
TBC1D19	-1.61083	2.42707e-06	0.000518399
TCP11L2	-1.46218	2.43642e-06	0.000519859
DTX3	-1.15413	2.44868e-06	0.000521935
LOC284244	-1.74356	2.46711e-06	0.000525318
CCNG1	-1.30417	2.49271e-06	0.000528585
RASA1	-1.35226	2.63197e-06	0.00055526
MRPS12	1.21448	2.64553e-06	0.000556981
PDK1	1.54959	2.65969e-06	0.000559391
FIGF	-3.18624	2.74893e-06	0.000575809
RAP2B	1.16909	2.78209e-06	0.000582163
NDUFA8	1.10883	2.78779e-06	0.000582765
ABCC8	-1.73375	2.79968e-06	0.000584658
C17orf54	-1.33914	2.81479e-06	0.000587219
LOC100132779	-1.02196	2.82279e-06	0.00058829
TTC18	-2.22838	2.83463e-06	0.000590162
P4HB	1.18106	2.84225e-06	0.000591151
PNRC1	-1.3674	2.86765e-06	0.000595704
BPNT1	1.87629	2.96551e-06	0.000614309
PRDX1	1.29538	3.03413e-06	0.000626889
UCHL1	3.79992	3.04536e-06	0.000628324
MRPL37	1.38289	3.08124e-06	0.00063509
RASSF6	-1.58018	3.08784e-06	0.000635815
DNAJC2	1.25028	3.13892e-06	0.000645689
NARF	1.17323	3.14994e-06	0.000647308
NDST1	-1.48578	3.18058e-06	0.000652955
CHAC2	2.22612	3.19239e-06	0.000654727
E2F8	2.22131	3.2119e-06	0.000658074
LOC727865	-1.06499	3.21522e-06	0.000658099
ZNF730	-1.03217	3.2229e-06	0.000659016
COL4A6	-3.04596	3.24363e-06	0.000661692
PLAT	-3.08533	3.24882e-06	0.000661692
GFM1	1.2359	3.29723e-06	0.000669565
TMSB15A	2.95453	3.31841e-06	0.000673203
GPR137C	2.18822	3.35263e-06	0.000678105
PPP1R14A	-2.42766	3.35553e-06	0.000678105
PIK3R1	-1.85533	3.37618e-06	0.000681568
BBS2	-1.21288	3.39769e-06	0.000684292
RAB6C	1.17702	3.39993e-06	0.000684292
CTSA	1.17108	3.41295e-06	0.000685635
TBC1D7	1.92433	3.45087e-06	0.000692577
NUDT5	1.97377	3.51769e-06	0.000703249
MTHFD1L	1.37442	3.5422e-06	0.000706778
IMPA2	1.65337	3.56096e-06	0.000709483
ATP6V0B	1.11774	3.56264e-06	0.000709483
PPAT	1.06652	3.57088e-06	0.000710437
LOC151878	-2.3841	3.62054e-06	0.000717547
CXCL11	3.71802	3.68968e-06	0.000729147
SAV1	-1.15883	3.69875e-06	0.000730238
CENPP	1.83173	3.73156e-06	0.000736012
KCNE1	-1.43567	3.83015e-06	0.000752576
CFI	-2.17765	3.84018e-06	0.000753829
LOC100131581	-1.24213	3.85103e-06	0.00075502
C1orf135	1.73543	3.85358e-06	0.00075502
KIT	-2.61052	3.93458e-06	0.000769428
SUV39H1	1.3654	3.99353e-06	0.000780216
MTFR1	1.33902	3.99734e-06	0.00078022
LILRA2	-1.9491	4.0156e-06	0.000781447
ARL15	-1.49184	4.01614e-06	0.000781447
ADFP	1.68588	4.01879e-06	0.000781447
ARPC4	1.03322	4.02858e-06	0.000782612
RAB27B	-2.07637	4.05322e-06	0.000786658
FIGNL1	1.22589	4.10935e-06	0.000795746
CUL2	1.21766	4.12133e-06	0.000796129
KIAA0831	-1.258	4.17522e-06	0.000804176
BYSL	1.46205	4.1786e-06	0.000804176
PAX6	2.80029	4.20919e-06	0.000807917
KIF21A	1.05442	4.20979e-06	0.000807917
HDAC2	1.0754	4.22593e-06	0.00081026
MTCH2	1.20028	4.25477e-06	0.00081503
MAPKAPK5	1.13411	4.26168e-06	0.000815321
ANKRD20A2	-1.86827	4.28148e-06	0.000817868
IDH2	1.79879	4.31107e-06	0.000821237
CTSL1	1.3446	4.33712e-06	0.000824675
CDRT4	-1.61848	4.34726e-06	0.000825841
PDCD10	1.08185	4.38021e-06	0.000830569
IFI30	1.87627	4.39158e-06	0.00083196
NDN	-2.98362	4.40787e-06	0.000833625
NUP205	1.21034	4.40854e-06	0.000833625
HIPK2	-1.05222	4.4125e-06	0.000833625
UBA2	1.01151	4.43964e-06	0.000837216
PPFIA4	2.39968	4.50607e-06	0.000848191
RASEF	-1.18068	4.62857e-06	0.00086729
HTATIP2	1.60177	4.6498e-06	0.000870476
COX7A1	-2.52277	4.73012e-06	0.000882342
PTPMT1	1.03326	4.73031e-06	0.000882342
SYCP3	-1.78686	4.7373e-06	0.000882848
TFRC	1.54633	4.7796e-06	0.000889927
UTP11L	1.11664	4.8068e-06	0.000894183
EDN2	3.55743	4.82425e-06	0.00089662
RAD21	1.31897	4.89382e-06	0.000908731
AKR1A1	1.24378	4.90551e-06	0.00090963
GARS	1.25752	4.90749e-06	0.00090963
FLJ13197	-2.39462	4.95954e-06	0.000918452
SLC16A6	-1.16428	5.01704e-06	0.000927434
RBM34	1.09747	5.07538e-06	0.000936479
FAM152A	1.40757	5.0796e-06	0.000936479
LOC645212	-1.59596	5.10679e-06	0.00093981
HRASLS	2.64074	5.11221e-06	0.000939969
TMEM194A	1.16107	5.1457e-06	0.000945282
ANP32E	1.64169	5.24756e-06	0.000962279
MST1	-1.72578	5.27978e-06	0.000965611
FH	1.35211	5.28588e-06	0.000965674
C1orf64	-3.13786	5.2895e-06	0.000965674
RP11-35N6.1	-1.94548	5.321e-06	0.000968931
QPCT	3.02451	5.36683e-06	0.000976334
SYAP1	1.10501	5.47092e-06	0.000993515
C6orf167	1.40402	5.55942e-06	0.00100781
AASS	-2.0783	5.58908e-06	0.0010123
FLVCR1	1.25375	5.59461e-06	0.00101241
RPL3	-1.0485	5.63462e-06	0.00101876
ACTL6A	1.18333	5.65793e-06	0.00102207
SPEF2	-1.36037	5.66761e-06	0.00102293
PDZK1	-2.31935	5.69975e-06	0.00102783
LOC202181	-1.02537	5.73735e-06	0.0010328
SETBP1	-1.51251	5.74522e-06	0.00103302
FLJ12078	-2.10698	5.75363e-06	0.00103302
LOC728855	-1.48782	5.76859e-06	0.00103481
SIM1	-1.09849	5.79355e-06	0.00103748
SLC10A1	-1.23121	5.86626e-06	0.00104868
CLIC6	-2.69142	5.92242e-06	0.00105506
SKP2	1.5059	5.99101e-06	0.00106635
GNG7	-1.35947	6.00384e-06	0.001067
TBCE	1.05781	6.02806e-06	0.00107018
POLA2	1.55241	6.06058e-06	0.00107502
NFIL3	1.06348	6.10465e-06	0.00108191
B3GALNT2	1.26186	6.14874e-06	0.00108785
ATP13A3	1.04873	6.18511e-06	0.00109335
ZNF200	1.22923	6.28065e-06	0.00110739
LRRCC1	1.36218	6.31638e-06	0.00111118
ADRA2A	-1.13461	6.31766e-06	0.00111118
COL4A3BP	-1.04846	6.31831e-06	0.00111118
SLC22A5	-1.31015	6.34818e-06	0.00111453
IFI27	3.16263	6.45441e-06	0.00113125
LOC649294	-1.09425	6.47282e-06	0.00113255
MRPS25	1.1721	6.53775e-06	0.00114197
GPRASP2	-1.98527	6.57734e-06	0.00114792
SHCBP1	1.87669	6.67044e-06	0.0011622
CISD1	1.00146	6.69706e-06	0.00116585
NUTF2	1.24205	6.77302e-06	0.00117808
ACOT9	1.08791	6.79735e-06	0.00117833
TXNIP	-1.50943	6.89916e-06	0.00119277
LOC100131004	-1.2356	6.90379e-06	0.00119277
SEC13	1.03356	6.93442e-06	0.00119706
APOO	1.20854	6.95824e-06	0.00120017
LYAR	1.05223	7.00783e-06	0.001207
VKORC1	1.14654	7.00954e-06	0.001207
HBB	-2.75609	7.01733e-06	0.00120733
GHSR	-1.03828	7.04522e-06	0.00121112
PHF5A	1.4707	7.13213e-06	0.00122503
SLC25A6	1.00678	7.16238e-06	0.00122921
B3GNT5	2.03032	7.18193e-06	0.00123154
RHOJ	-2.149	7.19324e-06	0.00123245
LCA5	-2.61876	7.20057e-06	0.00123268
SP2	-1.1866	7.25626e-06	0.00124015
NUS1	1.04685	7.37066e-06	0.00125766
ZNF175	-1.82925	7.37716e-06	0.00125769
LOC100131401	1.04312	7.43014e-06	0.00126567
RPL15	-1.04844	7.46057e-06	0.00126951
DYNC2LI1	-1.13861	7.46497e-06	0.00126951
TTF2	1.28512	7.50112e-06	0.00127251
CHTF18	1.23355	7.51969e-06	0.00127461
RCBTB2	-1.37248	7.55265e-06	0.00127914
RDH10	2.86636	7.60396e-06	0.00128584
TSPYL2	-1.15054	7.61525e-06	0.00128584
TMTC1	-3.03804	7.63802e-06	0.00128831
NOSTRIN	-2.4847	7.68114e-06	0.00129415
NDUFB9	1.21388	7.7316e-06	0.0013009
FREQ	1.69685	7.80464e-06	0.00131212
KARS	1.72032	7.83305e-06	0.00131582
SLMO1	1.76072	7.88709e-06	0.00132382
PDIA5	1.5261	7.90393e-06	0.00132557
HYLS1	1.3677	7.94355e-06	0.00133113
ASAM	-1.34399	7.99757e-06	0.00133909
CTSF	-1.33146	8.02418e-06	0.00134137
RIPK2	1.12071	8.05266e-06	0.00134504
LOC387763	2.70055	8.17826e-06	0.00136367
LTBP1	2.19654	8.19113e-06	0.00136367
FABP5	2.11689	8.21835e-06	0.00136607
LRRFIP1	-1.28816	8.25922e-06	0.00136974
ICAM1	1.90437	8.2946e-06	0.00137431
RAD54B	1.35513	8.38516e-06	0.0013882
GSDMC	2.76821	8.39486e-06	0.00138869
SPG11	-1.03208	8.53185e-06	0.00140796
CCT6A	1.0959	8.58116e-06	0.00141497
MMP1	3.16835	8.59142e-06	0.00141553
LOC100128961	1.16212	8.68088e-06	0.00142684
C1orf51	1.72988	8.69755e-06	0.00142845
ABL2	1.16974	8.75865e-06	0.00143733
GNAI3	1.37252	8.77612e-06	0.00143906
DHTKD1	1.22448	8.83554e-06	0.0014465
NEK3	-1.0953	8.86579e-06	0.0014503
NPHP1	-1.31721	8.929e-06	0.00145948
C6orf10	-1.77143	8.97763e-06	0.00146626
LOC646652	-1.38739	8.98635e-06	0.00146653
CAPN1	1.01595	9.07204e-06	0.00147817
STAT1	1.62518	9.10978e-06	0.00148315
NMU	3.59074	9.1903e-06	0.00149508
SDPR	-1.91423	9.23852e-06	0.00150174
C4orf32	-1.81653	9.25001e-06	0.00150242
NEU1	1.40068	9.28412e-06	0.00150677
Magmas	1.12508	9.31495e-06	0.00151058
ADRBK2	-1.28405	9.32827e-06	0.00151156
KLHL29	-1.40685	9.44358e-06	0.00152853
SRGAP2	1.25659	9.44785e-06	0.00152853
C8orf33	1.07614	9.52556e-06	0.00153869
LOC100129395	-1.18041	9.72307e-06	0.00156936
LAMB3	-2.64811	9.90744e-06	0.00159537
MXI1	-1.69327	9.98019e-06	0.00160583
LDLR	1.30676	1.00702e-05	0.00161905
KIAA1324	-2.64579	1.01719e-05	0.00163413
CALU	1.25241	1.03489e-05	0.00166126
POP4	1.10998	1.04586e-05	0.00167595
CCT6P1	1.04615	1.04648e-05	0.00167595
SNURF	-2.6596	1.07325e-05	0.00171085
SUGT1L1	-1.63523	1.08121e-05	0.00172088
CTTNBP2	-2.23675	1.09712e-05	0.00173548
PGM3	1.33099	1.10701e-05	0.00174711
MRPL15	1.47837	1.11803e-05	0.0017591
MYOF	-1.2781	1.11946e-05	0.00176001
YARS	1.38431	1.13007e-05	0.00177535
PDGFRA	-2.41	1.15096e-05	0.0018054
MRPS7	1.71984	1.15466e-05	0.00180852
TAP1	2.35515	1.1604e-05	0.00181534
ASS1	1.86476	1.17432e-05	0.00183091
CTSC	1.81142	1.17801e-05	0.00183527
SLC25A32	1.33742	1.19964e-05	0.00186312
PUF60	1.04034	1.20041e-05	0.00186312
PSD2	-1.59391	1.2028e-05	0.00186543
SRPX	-2.01483	1.21475e-05	0.00188255
CPE	-2.50185	1.21736e-05	0.00188518
GPRIN1	2.09748	1.22401e-05	0.00189404
DERL1	1.12555	1.23345e-05	0.0019058
PSAT1	2.17721	1.25836e-05	0.00194137
PRDM2	-1.05435	1.25994e-05	0.00194235
EEF1E1	1.72136	1.26981e-05	0.00195465
TRPC3	-1.06914	1.28632e-05	0.00197859
SLC39A4	1.4799	1.29135e-05	0.00198484
LOC440311	-1.12511	1.30501e-05	0.00200285
RGMB	-1.30916	1.30998e-05	0.00200775
FAM126A	-1.43313	1.31579e-05	0.00201489
CA12	-2.15715	1.32012e-05	0.00202002
MT1JP	-1.38901	1.32771e-05	0.00202863
ETV1	-2.41463	1.33979e-05	0.00204405
HIST1H1B	1.11392	1.34336e-05	0.00204797
WNT4	-1.04217	1.36909e-05	0.00207951
DCTPP1	1.15655	1.38403e-05	0.00210065
RGNEF	-1.5408	1.39621e-05	0.00211468
PPP1R3C	-3.5486	1.40858e-05	0.00213009
SORBS1	-1.18933	1.42786e-05	0.00215765
ACER3	1.49611	1.43264e-05	0.00216329
EGR3	-2.91087	1.4358e-05	0.00216648
SIX4	1.25561	1.43705e-05	0.00216677
CA8	-2.68708	1.44013e-05	0.00216983
CDC123	1.24841	1.44399e-05	0.00217406
DBN1	1.44629	1.4519e-05	0.00218167
TMEM167A	1.08116	1.46073e-05	0.00219286
CYTSB	1.54473	1.48753e-05	0.00222822
NISCH	-1.06963	1.49341e-05	0.00223375
PPP1R16A	1.06529	1.50058e-05	0.00223963
HSD17B6	1.95824	1.52627e-05	0.00226811
RELT	1.37339	1.52754e-05	0.00226837
ASCC1	1.48708	1.53086e-05	0.00227167
PSMA5	1.16522	1.53784e-05	0.00228038
IGF1R	-1.70156	1.55668e-05	0.0023017
PDLIM3	-2.27348	1.57023e-05	0.0023184
RHBDL2	1.53858	1.58089e-05	0.00233067
C18orf56	1.98994	1.58193e-05	0.00233067
IRX2	-2.83046	1.5938e-05	0.00234648
FRMD6	-1.48305	1.6162e-05	0.00237775
DEK	1.34135	1.62027e-05	0.00238204
IL17RD	-1.70849	1.62744e-05	0.00239089
WARS	2.43157	1.65265e-05	0.00242385
TPMT	1.22789	1.66247e-05	0.0024354
PARP3	-1.03551	1.66586e-05	0.00243757
LRFN4	1.42223	1.66631e-05	0.00243757
MIER3	-1.0761	1.67159e-05	0.00244319
PTTG3	1.41977	1.67464e-05	0.00244454
ZSWIM5	-1.78479	1.67706e-05	0.00244633
CDC14A	-1.65204	1.68134e-05	0.00244739
POP1	1.58313	1.68134e-05	0.00244739
BAK1	1.02413	1.7267e-05	0.0025081
B4GALT3	1.50858	1.75361e-05	0.00254182
GAS1	-1.76535	1.7867e-05	0.00258795
RAB2B	-1.00443	1.81194e-05	0.00262083
RBM19	-1.33813	1.81956e-05	0.00262633
CTSL2	2.44519	1.82408e-05	0.00262916
FBXL20	-1.92834	1.83994e-05	0.00265018
RNFT2	2.13188	1.85958e-05	0.00267659
C7orf63	-1.55988	1.88127e-05	0.00270214
UNQ6487	-1.09043	1.88817e-05	0.00270829
IDI1	1.51275	1.89087e-05	0.00270845
ADAMTS4	2.38634	1.8962e-05	0.00271414
MORG1	1.30844	1.9028e-05	0.00271981
TSEN34	1.05063	1.9142e-05	0.00273421
TMEM25	-1.83875	1.92629e-05	0.00274956
HIST1H1C	2.02483	1.94712e-05	0.00277353
MRS2	1.04072	1.9547e-05	0.00278009
LASS2	1.07068	1.95577e-05	0.00278009
APBB2	-1.01875	1.97292e-05	0.00279868
FAM54A	1.46986	2.0103e-05	0.00284583
SLC25A26	-1.51074	2.01449e-05	0.0028498
CHRM5	-1.29685	2.047e-05	0.00289184
LOC100128108	-2.07415	2.05117e-05	0.00289573
GINS2	2.0399	2.072e-05	0.00291615
EPB49	-1.22261	2.07308e-05	0.00291615
MTBP	1.41384	2.07393e-05	0.00291615
LOXL2	1.9458	2.07751e-05	0.00291615
CRIM1	-1.64633	2.07848e-05	0.00291615
SF3B4	1.24976	2.07978e-05	0.00291615
EYS	-1.53163	2.09534e-05	0.00293398
TMSB15B	1.87078	2.10533e-05	0.00294397
FLJ20184	-1.96846	2.12049e-05	0.00296196
NDRG1	1.61186	2.12593e-05	0.00296673
VRK1	1.0729	2.12783e-05	0.00296738
TFDP1	1.38273	2.16524e-05	0.0030175
SPOCD1	1.39039	2.19725e-05	0.00305705
ELAVL2	1.86801	2.19806e-05	0.00305705
SASH1	-1.26554	2.21365e-05	0.0030725
STAT6	-1.54575	2.23071e-05	0.0030941
SSBP2	-1.49251	2.23312e-05	0.00309536
FLJ27365	-1.69805	2.23648e-05	0.00309793
FANCE	1.82216	2.26545e-05	0.00313175
ABCA6	-1.48262	2.2691e-05	0.00313336
OR10A2	-1.02475	2.28051e-05	0.00314414
CCDC11	-1.70029	2.28464e-05	0.00314773
PDXK	1.26302	2.36844e-05	0.00325448
LYPD6	-1.64518	2.39397e-05	0.00328518
SH3D19	-1.56627	2.41597e-05	0.00330705
MAL2	1.17596	2.41633e-05	0.00330705
CD58	1.15266	2.42702e-05	0.00331949
ECOP	1.74282	2.43429e-05	0.00332722
PAK3	-2.00738	2.43897e-05	0.0033314
ISG20	1.74186	2.46058e-05	0.0033587
FYCO1	-1.74757	2.46955e-05	0.00336648
NME1	1.11099	2.47218e-05	0.00336784
SEMA3C	-2.31898	2.47899e-05	0.00337488
C18orf24	1.39823	2.48219e-05	0.00337701
INHBB	-2.43231	2.501e-05	0.00340036
JAM3	-1.26676	2.51663e-05	0.00341935
ABLIM3	-1.30401	2.52372e-05	0.00342652
POLK	-1.03733	2.54025e-05	0.00344463
SLC39A7	1.06425	2.54246e-05	0.00344536
ZNF334	-2.20581	2.5517e-05	0.00345463
MRPS23	1.07273	2.56035e-05	0.00346278
FMOD	-2.52164	2.56398e-05	0.00346542
LOC727820	-1.78633	2.57026e-05	0.00346985
SLC16A1	2.27211	2.57063e-05	0.00346985
PSMB3	1.18091	2.57311e-05	0.00347092
WDR76	1.59602	2.58406e-05	0.00348212
CX3CL1	-1.99448	2.5903e-05	0.003485
C10orf79	-1.2434	2.59239e-05	0.00348507
RERGL	-2.82375	2.59374e-05	0.00348507
PCNX	-1.27772	2.599e-05	0.00348986
FAM83H	1.0544	2.61679e-05	0.00351147
CAB39L	-1.49235	2.63759e-05	0.00353707
RNF128	-2.363	2.65205e-05	0.00355184
TMEM206	1.28864	2.68463e-05	0.00359081
MAZ	1.37223	2.69444e-05	0.00359925
MRPL44	1.47582	2.72451e-05	0.00363707
AHNAK	-1.52341	2.72755e-05	0.00363877
MYBL1	1.71792	2.82272e-05	0.00374787
CYP3A7	-1.2388	2.8284e-05	0.00375146
SEPP1	-2.35715	2.84331e-05	0.00376396
TXNDC6	-1.50945	2.92153e-05	0.00386008
LOC645726	1.17044	2.92361e-05	0.00386035
GLRX2	1.64348	2.96092e-05	0.00389713
VIPR1	-2.14581	2.96567e-05	0.00390089
RUNDC2B	-1.00604	2.99113e-05	0.00392937
LMOD1	-1.27866	3.02858e-05	0.00397097
ATP7A	-1.58349	3.03633e-05	0.0039786
LOC100130464	-2.18896	3.05072e-05	0.00399037
CSTF1	1.03954	3.05112e-05	0.00399037
DACH1	-2.51199	3.07276e-05	0.00401613
ZNF442	-1.52132	3.10721e-05	0.00405601
SLC6A9	2.32071	3.11174e-05	0.00405935
ZNF595	-1.00054	3.12847e-05	0.00407537
ZNF567	1.40794	3.12996e-05	0.00407537
LOC221442	-1.93623	3.14373e-05	0.00408814
EME1	1.36958	3.16787e-05	0.00410903
SIDT2	-1.03548	3.16976e-05	0.00410903
PIK3R3	1.20869	3.20013e-05	0.0041458
JAM2	-2.12954	3.21729e-05	0.0041654
SIX1	3.40451	3.23495e-05	0.00418301
EFNB3	-1.46044	3.24462e-05	0.00419205
AGR3	-3.07967	3.24601e-05	0.00419205
NME5	-2.82222	3.25014e-05	0.00419477
KIAA1731	1.27478	3.26202e-05	0.00420746
IL7	-1.68292	3.28299e-05	0.00423186
UNQ565	-1.46888	3.29794e-05	0.00424848
FLJ40113	-1.35625	3.33103e-05	0.00428575
NBEA	-1.69074	3.3348e-05	0.00428792
ADD3	-1.21589	3.33691e-05	0.00428796
CRYBA1	-1.73853	3.35118e-05	0.00430357
THSD1	-1.30966	3.35324e-05	0.00430357
MIF	1.01017	3.37054e-05	0.00432308
LOC653080	-1.15103	3.38108e-05	0.0043339
RORC	-2.09415	3.42295e-05	0.00437669
DUS1L	1.19082	3.43336e-05	0.00438727
RFC2	1.73339	3.44584e-05	0.0044005
POLR2D	1.01649	3.4715e-05	0.00442504
LOC100133224	-1.77809	3.47484e-05	0.00442657
TRIM24	1.0762	3.4921e-05	0.0044458
XKR6	-2.36221	3.54002e-05	0.00449847
DKFZp566H0824	-1.19179	3.59714e-05	0.00455982
C5orf23	3.24969	3.60085e-05	0.00456171
NDUFA9	1.07727	3.61769e-05	0.00457741
SOX11	3.48223	3.6525e-05	0.00461296
HEATR3	1.18529	3.66045e-05	0.00462017
ACSM1	-2.25818	3.67125e-05	0.00463097
PIGX	1.45412	3.68464e-05	0.00463651
KIF4A	1.15526	3.70304e-05	0.00465164
PSRC1	1.37862	3.70343e-05	0.00465164
KLHDC4	1.77425	3.71256e-05	0.00465823
C6orf66	1.13326	3.7132e-05	0.00465823
C8orf76	1.25241	3.71551e-05	0.00465829
HICE1	1.45059	3.82833e-05	0.0047736
THAP6	-1.50894	3.84556e-05	0.00479219
P2RY5	-1.51059	3.91331e-05	0.00486779
DMKN	-1.94981	3.93051e-05	0.00488582
GSTM4	-2.00403	3.94371e-05	0.00489379
KIAA1377	-1.83103	3.94673e-05	0.00489459
INSIG1	1.5203	3.96083e-05	0.00490912
FNDC1	1.92615	3.97476e-05	0.0049183
PTRH2	1.04069	3.97778e-05	0.0049183
ZWINTAS	1.89107	3.98078e-05	0.00491906
PAK1IP1	1.29306	3.98936e-05	0.00492671
TCAM1	2.98713	3.99932e-05	0.00493322
C2	1.54972	3.99942e-05	0.00493322
ATP10D	-1.15882	4.04161e-05	0.00497633
LOX	1.94235	4.0544e-05	0.00498767
PRDX2	1.0848	4.05808e-05	0.00498767
LGALS1	1.49375	4.10107e-05	0.00502553
RPN2	1.36855	4.15567e-05	0.00507884
C1orf115	-1.91698	4.15939e-05	0.00507884
LOC100128288	-1.3385	4.16421e-05	0.00507884
ZNF707	1.72375	4.16429e-05	0.00507884
HSF1	1.07345	4.17535e-05	0.00508838
HMGB2	1.12881	4.17824e-05	0.00508838
LGR6	-1.99061	4.22335e-05	0.00513567
PLSCR4	-1.95413	4.23664e-05	0.0051488
PDGFD	-1.34676	4.24024e-05	0.00515014
VSIG2	-1.371	4.25572e-05	0.00515982
PDSS1	1.48819	4.27615e-05	0.00518154
POM121L4P	-1.07979	4.2885e-05	0.00519345
TESC	-3.10273	4.32754e-05	0.00523151
CDC25B	2.03133	4.40242e-05	0.00531579
PDE2A	-1.68896	4.42535e-05	0.00534035
LOC646626	-1.54047	4.44205e-05	0.00535424
PHF15	-1.26478	4.52041e-05	0.0054328
CDK8	1.75459	4.52378e-05	0.00543369
SERPINH1	1.84347	4.53934e-05	0.00544387
SERINC1	-1.02278	4.54179e-05	0.00544387
ANXA1	-1.51576	4.54282e-05	0.00544387
RFWD3	1.39625	4.63182e-05	0.00553443
APOLD1	1.52833	4.66703e-05	0.00557005
DCLK1	-2.04319	4.7368e-05	0.00563699
PRDM6	-1.08681	4.74962e-05	0.00564898
TNFRSF12A	1.15716	4.80163e-05	0.00570426
CGNL1	-1.65295	4.81284e-05	0.00571428
MYBPC3	-1.07185	4.83539e-05	0.00573776
LGMN	1.50514	4.90124e-05	0.00580586
AUH	-1.04208	4.9554e-05	0.00586328
FRY	-1.88514	4.98816e-05	0.00588801
LRRC48	-1.17164	4.99058e-05	0.00588801
TUBB2B	-2.79187	5.00605e-05	0.00590288
DCUN1D5	1.03083	5.02018e-05	0.00591616
DNMBP	-1.55664	5.03582e-05	0.00593119
CEP70	1.21048	5.04021e-05	0.00593298
SCGB3A1	-2.94747	5.11486e-05	0.00600712
LOC442590	-1.03084	5.12094e-05	0.00601085
ADCY7	1.48852	5.12774e-05	0.00601197
ZNF177	-1.40569	5.13953e-05	0.00601899
PPIF	1.2819	5.13956e-05	0.00601899
FLJ10038	-1.1996	5.17513e-05	0.00605033
LOC646791	1.06476	5.21922e-05	0.00609151
SLC16A4	-1.68916	5.29076e-05	0.0061541
ABCB1	-1.37708	5.2954e-05	0.00615603
HOXB9	1.29041	5.29875e-05	0.00615644
BEND5	-2.26524	5.33054e-05	0.00618956
NMB	1.90456	5.33626e-05	0.00618956
SORCS2	-1.55496	5.3484e-05	0.00620015
ARMCX1	-1.06853	5.35519e-05	0.00620453
BCL2L12	1.38402	5.36953e-05	0.00621765
C1orf168	-1.65769	5.4393e-05	0.00629137
RP11-345P4.4	-1.12453	5.45925e-05	0.00631091
ME2	1.19751	5.46316e-05	0.00631188
NUP93	1.26016	5.4898e-05	0.00633556
LASS5	-1.37087	5.50056e-05	0.00634088
ELOVL7	1.41565	5.53108e-05	0.00636183
PPP2R2B	-1.37165	5.57073e-05	0.00639672
TMEM163	-1.55744	5.58947e-05	0.00641468
TPRG1	-2.43084	5.59726e-05	0.00642004
BRUNOL6	-2.19317	5.65176e-05	0.00647895
TRIM68	-1.62953	5.70313e-05	0.00652333
SLC40A1	-2.07836	5.81264e-05	0.00662652
ZMAT1	-1.80893	5.85145e-05	0.00666707
DAAM2	-2.51992	5.87596e-05	0.0066876
ANKRD42	-1.77228	5.92605e-05	0.00673717
CYBRD1	-1.69065	5.92963e-05	0.00673753
HIG2	1.06193	5.94206e-05	0.00674793
NDUFA4	1.01098	5.9628e-05	0.00676403
NAV2	-1.58357	5.96847e-05	0.00676674
ABCG2	-2.28812	5.99411e-05	0.00678834
CD36	-2.67459	6.00723e-05	0.00679946
CCL18	2.83234	6.09485e-05	0.00689107
SCN4A	-2.12962	6.14646e-05	0.00694173
LOC341230	1.20409	6.14654e-05	0.00694173
PCM1	-1.10831	6.15437e-05	0.00694313
COL1A1	2.26314	6.17376e-05	0.00696119
GNG4	2.32953	6.18875e-05	0.00697428
ASPA	-1.27861	6.22341e-05	0.00699559
SLC25A33	1.43131	6.22463e-05	0.00699559
TFAP2B	-4.05715	6.29528e-05	0.00706389
CD276	1.32375	6.29568e-05	0.00706389
DNAH7	-1.40581	6.32269e-05	0.00708648
ARMCX2	-1.19896	6.35507e-05	0.00710343
ZNF134	-1.32214	6.38988e-05	0.00713462
C9orf142	1.12863	6.43669e-05	0.00717911
BAT5	1.20628	6.45365e-05	0.00719413
COQ2	1.94062	6.49678e-05	0.0072383
VPS72	1.09004	6.54523e-05	0.0072844
FAM89B	1.34111	6.59896e-05	0.00733467
TMEFF1	2.06229	6.60462e-05	0.00733467
DKFZp667F0711	-2.65209	6.63415e-05	0.00735952
TP53INP2	1.82845	6.65276e-05	0.0073762
C10orf32	-1.00046	6.68004e-05	0.00740247
LOC729234	-1.71842	6.75187e-05	0.0074768
LMO4	1.78793	6.75437e-05	0.0074768
FLJ39653	-1.57714	6.77687e-05	0.00748622
MTDH	1.03141	6.77741e-05	0.00748622
COX4NB	1.55368	6.83175e-05	0.0075422
RPS19BP1	1.00994	6.83772e-05	0.00754472
MICB	1.56837	6.84136e-05	0.00754472
CCDC84	-1.16339	6.85605e-05	0.00755689
KIAA1370	-1.55292	6.87604e-05	0.00757082
HOXA9	-3.20132	6.89953e-05	0.00758914
LOC400464	-1.99871	6.90699e-05	0.00759272
HM13	1.14356	7.01476e-05	0.00769888
C3orf18	-1.73966	7.03423e-05	0.00771614
CAPN11	-1.35562	7.05387e-05	0.00773357
NDUFS8	1.01204	7.13114e-05	0.00780582
LY6G6C	-1.07711	7.23424e-05	0.00790916
ABCC4	1.96483	7.24394e-05	0.00790916
LUZP2	-2.59474	7.24547e-05	0.00790916
LEPR	-1.61379	7.24857e-05	0.00790916
IGF1	-2.07001	7.25388e-05	0.00791077
CDKN2B	2.06574	7.342e-05	0.00799841
FXYD5	1.00953	7.3527e-05	0.00800583
LBH	-1.25918	7.39169e-05	0.00804124
TGFBR2	-1.66584	7.39303e-05	0.00804124
IGSF21	-1.36101	7.41306e-05	0.00805879
IL6ST	-1.57094	7.4671e-05	0.0080997
CLDN8	-1.68113	7.47035e-05	0.0080997
PRICKLE1	1.7579	7.53017e-05	0.00816027
HEPACAM2	-1.36193	7.56557e-05	0.00819432
FAM113A	-1.00743	7.61236e-05	0.00823635
RIBC1	-1.18122	7.69001e-05	0.00830728
OPLAH	1.13475	7.69846e-05	0.00831205
TP53BP2	1.29659	7.76747e-05	0.00837341
MED30	1.57763	7.81324e-05	0.00841834
ZNF781	-1.22727	7.86e-05	0.0084643
OR7E91P	-1.17305	7.87189e-05	0.00847267
TAF4	1.42834	7.88329e-05	0.00848051
PLA2R1	-1.5058	7.8952e-05	0.0084889
MYOM2	-1.13292	7.90354e-05	0.00849343
CLIP4	-1.42663	7.97524e-05	0.0085494
DHFR	1.02301	8.04739e-05	0.00859425
ITGA2	-1.23152	8.10044e-05	0.00864195
NCK1	1.38427	8.10627e-05	0.0086437
FTL	1.10697	8.16731e-05	0.00869529
MUC3A	-1.57051	8.19992e-05	0.008721
EIF4G1	1.15303	8.28117e-05	0.00879053
RANBP3L	-1.5494	8.28236e-05	0.00879053
OR5P2	-1.92708	8.33463e-05	0.00883473
RGS10	1.4088	8.35222e-05	0.0088433
GOLT1B	1.18057	8.44253e-05	0.00891542
KIRREL	-1.49615	8.51394e-05	0.00898083
RHOU	-1.00755	8.59403e-05	0.00904679
HORMAD1	3.7747	8.63637e-05	0.00907745
AP2S1	1.5415	8.6671e-05	0.0091051
TSGA10	-2.09395	8.73094e-05	0.00916283
MAOA	-2.60532	8.84684e-05	0.00926559
HISPPD2A	-1.68692	8.89477e-05	0.00931106
PTEN	-1.43089	8.89998e-05	0.00931178
FOXO1	-1.22028	9.03931e-05	0.00944318
OBSCN	-1.28072	9.08364e-05	0.00948468
PHF17	-1.1356	9.17503e-05	0.00955108
FAM108B1	1.29017	9.22459e-05	0.0095961
RAP2A	1.07676	9.2319e-05	0.0095961
TUBB4	1.65	9.23225e-05	0.0095961
LAMP3	2.62423	9.27948e-05	0.00963063
ZNF780B	-1.10234	9.36879e-05	0.00971353
DPY19L2	-1.02417	9.40216e-05	0.00973833
C11orf61	-1.89806	9.46867e-05	0.00979738
LOC100128139	-2.29107	9.47778e-05	0.00980189
LOC100125556	1.04835	9.51076e-05	0.00983106
SLC26A10	-1.32001	9.70492e-05	0.0100117
MATN2	-2.48129	9.71806e-05	0.0100152
FAM101A	-2.34878	9.83113e-05	0.0101166
LSM12	1.36274	9.87473e-05	0.0101564
NUP85	1.07678	9.92679e-05	0.0101946
NCAPD2	1.59688	0.000100907	0.0103491
MAP2K6	-1.42376	0.000100923	0.0103491
TMEM104	1.3389	0.000100994	0.0103513
WDR67	1.83248	0.000101608	0.0104039
PELI2	-2.11755	0.000101704	0.0104067
AMT	-1.43584	0.000102028	0.0104313
SLCO3A1	-1.45973	0.000102198	0.0104435
NFXL1	1.39315	0.000102298	0.0104486
RFC5	1.15999	0.000103249	0.0105353
PDCD2L	1.32974	0.000103623	0.0105682
ABCF2	1.0681	0.000103889	0.0105848
LETM2	-2.40238	0.000103955	0.0105854
FLJ41603	-1.6156	0.000103998	0.0105854
LOC100128439	-1.53531	0.000104161	0.0105968
MRPL12	1.30099	0.000105393	0.0107063
MPPED2	-1.83943	0.00010546	0.0107078
ME1	2.36629	0.000105772	0.0107343
LOC344382	1.24283	0.000106698	0.0108069
NUDT10	-1.55633	0.000106848	0.0108114
MYLK	-2.13545	0.000107077	0.0108294
GLI3	-2.19938	0.000107724	0.0108894
LOC100130107	-1.18295	0.000108038	0.0109158
ATP6V1F	1.00038	0.000109321	0.0110239
SEPT3	1.98762	0.000109382	0.0110246
SRGAP1	-1.16517	0.000109444	0.0110254
ATP11A	1.60137	0.000109794	0.0110499
NOX4	1.28797	0.00011032	0.011092
CSTF2	1.06833	0.000111797	0.0112241
SPAG8	-2.43155	0.00011198	0.011236
C21orf49	-1.37127	0.000112025	0.011236
LPCAT1	1.14855	0.00011312	0.0113313
TNS4	-2.26862	0.00011314	0.0113313
RPP25	2.13354	0.000113525	0.0113643
C8orf84	-1.96857	0.000113815	0.0113878
PTRF	-1.54278	0.000114821	0.0114718
LOC728875	-1.12318	0.00011636	0.0116031
EN1	2.86011	0.000116487	0.0116101
ABAT	-1.69859	0.000117496	0.0117051
HOXB3	-1.84099	0.00011843	0.0117923
CLASP1	1.24572	0.000119261	0.0118546
KIF2A	1.10115	0.000119285	0.0118546
CXCL9	3.66876	0.000120439	0.0119578
HEPN1	-1.24624	0.000120934	0.0120012
FGFR3	1.96581	0.000121466	0.0120366
R3HDM1	1.07219	0.000123041	0.0121751
ALOX15B	-1.67083	0.00012382	0.0122404
TPM1	-1.2232	0.000123895	0.0122419
GPX2	-1.02546	0.000124411	0.012287
GLUD1	-1.0339	0.000124678	0.0123016
HMOX1	1.45847	0.000124855	0.0123088
RILPL2	-1.25215	0.00012487	0.0123088
C7orf41	-1.62732	0.000125196	0.012335
ACO1	1.12049	0.000127488	0.0125368
C10orf33	-1.07105	0.000128274	0.0125961
LOC100190890	-1.90102	0.000128878	0.0126493
MFAP5	1.67723	0.000129626	0.0127168
KRT15	-2.62097	0.000130835	0.012817
SLC4A7	-1.28782	0.000130959	0.0128231
MMP19	-1.05658	0.000132277	0.0129276
PFDN4	1.28995	0.000132778	0.0129704
CAMK1D	1.57135	0.000133985	0.0130662
PPAP2A	-1.29143	0.000134139	0.0130662
STAT5A	-1.5752	0.00013603	0.0132316
KCNMB1	-1.26569	0.00013625	0.0132468
INTU	-1.09085	0.000136451	0.01326
INTS7	1.60432	0.000136717	0.0132734
POLR2I	1.19582	0.000136805	0.0132757
ZHX1	1.26302	0.000138797	0.0134501
LSM2	1.47011	0.000139023	0.0134656
RSAD2	2.76879	0.000139677	0.0134922
ZNF518B	1.16083	0.000141108	0.0136036
LIMCH1	-1.33046	0.000142777	0.0137196
PNPLA3	2.79462	0.000142903	0.0137253
KIF5A	-1.09455	0.000143369	0.0137508
CCDC44	1.25804	0.000143647	0.0137711
CNTNAP3	-2.54324	0.000144151	0.0138066
FBXO5	1.23846	0.000144228	0.0138075
C20orf12	-1.23826	0.000144769	0.0138528
XG	2.92801	0.000145533	0.013913
TIMP2	1.39062	0.00014583	0.013935
FAM29A	1.02632	0.00014597	0.0139355
NRN1	1.79945	0.000147769	0.0140855
PDIA6	1.13834	0.000148748	0.0141547
TPM2	-1.52199	0.000149323	0.0141833
PNPLA7	-1.01741	0.000149876	0.0142227
RP11-138L21.1	-1.99443	0.000150098	0.0142307
RGL2	-1.34434	0.000150809	0.0142849
GINS3	1.49789	0.000151559	0.0143494
KTI12	1.43545	0.000153283	0.0144794
FLJ30403	-1.19575	0.000154285	0.014554
C18orf19	1.08731	0.000154959	0.0145908
FAM13A1OS	-1.63543	0.000155118	0.0145992
AP1S2	1.41141	0.000155243	0.0146043
IFI6	1.52522	0.000155429	0.0146085
KRT5	-2.37155	0.00015543	0.0146085
LOC389831	-1.5323	0.000157407	0.0147607
VKORC1L1	1.08518	0.000158791	0.0148673
BHLHE41	-2.683	0.000159984	0.014933
IGF2	-1.50652	0.000160131	0.0149346
C9orf30	1.27436	0.000161282	0.0150276
SLFN11	1.89157	0.000161347	0.0150276
NOXO1	1.3272	0.000163602	0.0152033
NF1	-1.26304	0.000164114	0.0152372
SOCS3	1.32627	0.000164379	0.0152549
ZNF528	-1.43189	0.000164836	0.0152889
HBD	-1.03338	0.000164894	0.0152889
SLFNL1	1.3471	0.00016602	0.0153794
CDK3	1.07531	0.000166843	0.0154487
BCL6B	1.27175	0.000170521	0.0156976
ZC3HC1	1.05593	0.000171208	0.0157539
C2orf63	-1.58588	0.000172603	0.0158751
BZRAP1	-1.32508	0.000172953	0.0159002
GJC3	-1.48704	0.000175819	0.0161278
DDB1	1.13503	0.000175918	0.0161296
C6orf129	1.34908	0.000176577	0.0161693
MACROD2	-1.60853	0.000176586	0.0161693
GPM6B	-1.24019	0.000177331	0.0162303
AZGP1	-2.6616	0.00017773	0.0162596
SHROOM3	-1.07341	0.000178629	0.0163346
TIMM10	1.05385	0.000181694	0.0165781
SULT2B1	-1.11506	0.000183288	0.0167013
GPR177	-1.80164	0.00018387	0.016738
CYP4F11	-2.29932	0.000183934	0.016738
TXNRD1	1.26558	0.000184047	0.0167409
APBA1	-1.47176	0.000184361	0.0167621
CCNYL1	1.69726	0.000184664	0.0167748
KDELC2	1.01998	0.000185039	0.0167941
S100A10	1.21532	0.000185359	0.0168157
STK38L	1.33224	0.000185494	0.0168206
ZNF71	1.69147	0.00018605	0.0168509
S100A11	1.09076	0.000186108	0.0168509
LIN7A	-2.1784	0.000186425	0.0168679
NLGN4Y	-1.14181	0.000186883	0.0168989
DIRAS3	-1.82158	0.000187013	0.0168989
LOC100131929	-1.03276	0.000188104	0.0169751
SEMA3G	-2.44307	0.000188401	0.0169945
C12orf5	1.27764	0.000190282	0.0171347
SLC36A4	1.43642	0.000192391	0.0173014
MSX2	-1.62024	0.000193562	0.0173782
PMEPA1	1.0282	0.000193583	0.0173782
ERG	-1.1721	0.000194124	0.0174116
DYNC2H1	-1.42187	0.000196041	0.0175683
GPD1L	-1.54694	0.000196742	0.0176235
SIGLEC15	-3.36285	0.000198223	0.0177406
FYN	1.1214	0.000198779	0.017775
GPRC5A	1.59456	0.000199003	0.0177873
MGC26718	-1.52288	0.000200674	0.0179211
LOC286161	-1.128	0.000202265	0.018032
SYNM	-2.40548	0.000202416	0.0180376
ZNF503	-1.90271	0.000205622	0.0182838
ROBLD3	1.03395	0.000207021	0.0184003
IKZF3	1.43933	0.000209202	0.0185781
CARS	1.43866	0.000209552	0.0186012
LRP2	-2.48243	0.000211772	0.0187579
TMEM56	1.47754	0.000212138	0.0187822
DOLPP1	1.13473	0.000212509	0.018807
BACE2	1.51395	0.000212674	0.0188116
HEBP2	1.02994	0.000212745	0.0188116
TRIM73	-1.14902	0.000213064	0.0188318
MMD	1.01841	0.000213794	0.018872
C10orf107	-1.00408	0.000214939	0.018965
ERI2	-1.24457	0.000216774	0.0191073
GPC4	2.12879	0.000217258	0.0191368
ENAH	1.01632	0.000219054	0.0192621
CPSF3	1.0974	0.000219425	0.0192865
NOS1AP	-1.67828	0.000220185	0.0193273
CXCL14	-2.81007	0.000220265	0.0193273
CHST6	1.56989	0.000222774	0.0195392
PCSK1	-1.21032	0.000223687	0.0196026
PKD2	-1.15402	0.000225064	0.0196981
PLEKHA6	-1.88472	0.000225632	0.0197227
C2orf64	-1.4933	0.000227436	0.0198384
GALNT10	-1.14332	0.000229024	0.0199347
C19orf12	1.21204	0.000230683	0.0200452
LY96	1.91614	0.000232994	0.0201949
CYP4A11	-1.03524	0.000234	0.0202396
CYGB	-1.21014	0.000235158	0.0203227
TTLL4	1.7161	0.000236343	0.0203995
CROT	-1.61818	0.000236458	0.0204008
POU5F2	-2.11855	0.000238002	0.0205169
TMPRSS2	-1.31419	0.000241447	0.0207705
DPY19L2P4	-1.11003	0.000241812	0.0207931
FAM120B	-1.18974	0.000242533	0.020829
FOXA1	-3.00059	0.000242778	0.0208327
PLIN	-1.50445	0.00024332	0.0208706
SEH1L	1.00297	0.000245543	0.0210525
SLC25A30	-1.6312	0.000246077	0.0210808
CKAP4	1.31587	0.000247413	0.021173
PCTK1	1.27679	0.000250099	0.021372
MRPL36	1.11718	0.000253089	0.0216007
GREB1	-2.16079	0.000254035	0.0216455
TGFB3	-1.5355	0.000254931	0.0216949
PTCD1	1.29665	0.000255986	0.0217758
EIF4E3	-1.06895	0.000256109	0.0217773
GJA1	-1.63298	0.000256831	0.0218296
WDR19	-1.0591	0.00025937	0.021991
C21orf62	-1.03611	0.000262837	0.0222484
SH3BGRL2	-1.69556	0.00026525	0.0224158
SNRPA1	1.04332	0.000267106	0.0225634
ABTB2	1.12317	0.000267761	0.0226001
MYO9A	-1.05487	0.000269405	0.0227018
SECTM1	1.05224	0.000270583	0.0227787
B3GNT1	-1.16839	0.000271868	0.0228719
SNAPC1	1.24679	0.000274454	0.0230575
GSK3A	1.13177	0.00027485	0.0230594
PSMC3IP	1.15586	0.000275791	0.023117
ITPR1	-2.00907	0.000277531	0.0232534
HPSE	1.9264	0.000279287	0.0233461
SPSB1	1.46841	0.000279486	0.0233508
KCND3	-1.0995	0.000281095	0.0234567
BAT2	1.00689	0.000281562	0.0234845
SORL1	-1.51728	0.000281656	0.0234845
NACC2	1.99832	0.000281805	0.0234874
LOC730834	1.15316	0.000283662	0.0236231
PDHX	1.19517	0.000286739	0.02386
C12orf49	1.05914	0.000287038	0.0238752
NEK11	-1.46307	0.00028804	0.023949
BEX2	-1.68642	0.000289545	0.0240547
GLIPR1L2	-1.60337	0.000291594	0.0241665
C14orf147	1.20339	0.000291797	0.0241735
APBB3	-1.22359	0.000292635	0.0242235
LOC100131176	-2.27793	0.000296549	0.0244689
ANAPC7	1.32588	0.000296832	0.0244824
GPX7	1.39727	0.000299055	0.0246264
INPP5J	-1.4366	0.000301517	0.0247994
HRSP12	1.18986	0.000301772	0.0248104
MX1	1.99517	0.000304847	0.0250233
DLK2	-1.32472	0.000305951	0.025084
FOXRED2	1.13646	0.000306164	0.0250915
RORA	-1.12368	0.000306471	0.0251067
TAPBP	1.06877	0.00030677	0.0251212
BRIP1	1.55493	0.000307014	0.0251312
RUNX1	-1.08249	0.000311024	0.025409
PTGER3	-1.19735	0.000311577	0.025444
LOC440731	1.69165	0.000312611	0.0255083
RUNX1T1	-1.49789	0.000312769	0.0255111
DHDH	1.18606	0.000313498	0.0255503
CD163	1.96015	0.000315181	0.0256469
PCOLCE2	2.64672	0.000316266	0.025725
CTSO	-1.19927	0.00032249	0.0261179
PANX1	1.18625	0.000324292	0.0262536
BAIAP2L1	1.5408	0.000325358	0.0263122
GZMB	2.11333	0.00032551	0.0263122
APITD1	1.44254	0.000325563	0.0263122
CTGF	2.68307	0.00032571	0.0263122
CELSR3	1.05751	0.000325782	0.0263122
RSPH1	-2.27265	0.000326478	0.026358
LEAP2	-1.46653	0.00032823	0.026458
BCL6	-1.11442	0.000328607	0.0264781
FOXD2	1.38888	0.00033286	0.0267684
RNASE1	1.73122	0.000333559	0.0268037
UBASH3B	1.85793	0.000334451	0.026865
C21orf45	1.14644	0.000338609	0.0271596
C15orf40	-1.25848	0.00034194	0.0273906
GLRX	1.34891	0.000342191	0.0273906
NKX2-1	-1.1084	0.000342455	0.0274011
GPIHBP1	-1.75326	0.000342733	0.0274127
TFB2M	1.00819	0.000343116	0.0274327
DAPK1	1.73342	0.000343461	0.0274464
LOC729029	-1.97828	0.000344448	0.0274752
CPEB2	-1.18615	0.000346304	0.0276019
AIG1	-1.04516	0.000347718	0.0276932
SMARCA1	-1.07855	0.000348498	0.0277446
LOC100128295	1.15693	0.000350808	0.0278911
CSK	1.20227	0.000351638	0.0279191
CNKSR3	1.12892	0.000354885	0.0281444
SPON2	1.74623	0.000360547	0.0285166
RBM35A	1.23917	0.000365271	0.0288129
ADCY3	1.01179	0.000369597	0.0291207
COTL1	1.51108	0.000370912	0.029213
OLFML1	-1.09658	0.000375112	0.0294763
GSTT2	-1.45602	0.00037898	0.0297123
PRKX	1.36034	0.000379512	0.0297427
ZNF608	-1.71849	0.000385227	0.0301333
MKI67	1.65511	0.00038553	0.0301455
PLEKHA8	1.2591	0.000387505	0.0302494
KPNA3	1.28979	0.000389037	0.0303277
MAB21L1	-1.67112	0.000390014	0.0303809
NDRG2	-1.70903	0.000390638	0.0304065
ELOVL5	-1.18391	0.000398906	0.0309799
PXDNL	2.07001	0.000401048	0.0310994
RP6-213H19.1	1.0634	0.000401311	0.031108
FMO2	-1.86822	0.000401832	0.0311368
DSC1	-1.63746	0.000407133	0.0314883
EML1	1.31104	0.00040847	0.0315562
ST8SIA2	-1.01686	0.000410909	0.0317089
DCX	-3.0653	0.00041594	0.0320492
NCRNA00153	-1.17663	0.000416206	0.0320577
PCTP	1.07361	0.000416473	0.0320663
TNFSF12	-1.84668	0.00041967	0.0322582
CXorf50	-1.4816	0.000419748	0.0322582
AR	-3.03524	0.000420542	0.0323072
SFRP1	-1.92835	0.000424083	0.0325671
CXCL12	-1.90678	0.000424555	0.0325813
PDLIM4	-1.19988	0.000424585	0.0325813
ART3	2.25816	0.000425745	0.032646
TRH	-1.07724	0.000432137	0.0330869
DKFZP547L112	-1.30456	0.000438512	0.0334726
OR2A20P	-1.03221	0.000439095	0.0334793
TMEM147	1.00357	0.00044403	0.0337842
HRH1	1.55597	0.000445622	0.0338928
CLDN18	-1.11824	0.000446784	0.0339365
ZNF250	1.36759	0.000446814	0.0339365
SLC45A4	1.4036	0.000451932	0.0342715
BCAT1	1.66172	0.000458308	0.0346913
SPAG1	1.06995	0.000460017	0.0347951
GNG11	-1.66052	0.00046254	0.0349731
GPR19	1.31094	0.000463326	0.0350196
MNS1	-1.67623	0.000464236	0.0350756
LOC100128661	-1.50677	0.000467895	0.0353132
OR2B2	1.39002	0.000469883	0.0354113
FAM89A	1.71912	0.000476689	0.0358587
TBX3	-1.75369	0.000480294	0.0361035
MRPS33	1.09528	0.000483062	0.0362587
RNF182	2.72863	0.000484788	0.0363419
FBXW4P1	-1.22482	0.000485236	0.0363557
COL5A2	1.66071	0.000498121	0.0372669
SFXN3	-1.09871	0.00049849	0.037281
C19orf52	1.30824	0.000499398	0.0373218
PRAME	3.46051	0.00050684	0.0377493
NLGN4X	-1.22585	0.000507077	0.0377493
PFN2	1.16249	0.00050886	0.0378506
ME3	-1.35955	0.000516069	0.038359
LIMA1	-1.15167	0.000528022	0.0390644
CDK2	1.48114	0.000529436	0.0391409
C5orf13	1.1848	0.00053219	0.0393022
MSL3L2	1.82789	0.000534516	0.0394191
C20orf20	1.3765	0.000535707	0.0394771
SEC61A1	1.04569	0.000536652	0.0395326
WDR5	1.0282	0.000541728	0.0398289
URB2	1.36151	0.00054404	0.0399483
SBNO2	-1.24776	0.00054444	0.0399635
PI4K2B	1.02722	0.000545495	0.0400158
SERPINB6	-1.16819	0.000545542	0.0400158
SLC7A8	-1.65519	0.000552468	0.0404807
MAOB	-2.41	0.000555267	0.0405953
WDR78	-1.26499	0.000555478	0.0405953
RAG1AP1	1.08251	0.000555608	0.0405953
CD38	1.67393	0.000556289	0.0406163
SOCS2	-2.25582	0.000557888	0.0407065
LOC730167	1.2244	0.000569073	0.0413356
HOXB7	1.17225	0.000571004	0.0414411
HNMT	-1.37044	0.000571556	0.0414665
SSPN	-1.75366	0.000572436	0.0415012
HSD17B14	-1.16706	0.000575443	0.0416605
VCAN	1.96016	0.000577591	0.0417867
SH3BP5L	1.14537	0.000579972	0.0419295
ZNF552	-1.26006	0.000581384	0.0420169
ZNF620	-1.23137	0.000583331	0.0421428
GFOD1	1.38818	0.000585968	0.0423185
CTLA4	1.46326	0.000586869	0.0423687
MKRN3	1.33197	0.000590937	0.0426027
LRRC8D	1.14841	0.000592687	0.0427139
ZNF516	-1.9114	0.000602207	0.0433243
ARHGEF3	-1.02242	0.000604551	0.0434777
GIN1	-1.00079	0.000606411	0.0435811
LOC729779	1.57863	0.000606689	0.0435859
GLO1	1.17299	0.0006235	0.0445452
ABHD3	1.07851	0.000625837	0.0446657
SCARB1	1.62143	0.000626902	0.0447263
WDYHV1	1.16899	0.000628001	0.0447892
TACC1	-1.00649	0.000633293	0.0451197
HIF1A	1.07382	0.000634454	0.0451868
ISM1	-1.88068	0.000637644	0.045367
CISD2	1.10242	0.000638896	0.0454247
TEAD4	1.29973	0.000642875	0.0456761
SLC35F2	1.45454	0.000644107	0.0457163
P2RY1	1.93117	0.000646493	0.0458383
ADAM19	1.77303	0.000649809	0.0459944
NR3C2	-1.52415	0.000650587	0.0460178
KIAA1683	-1.28247	0.000652724	0.0461531
LOC284072	1.36716	0.000653518	0.0461776
SNHG3-RCC1	1.04667	0.000660552	0.0465629
SIDT1	-1.78709	0.000662444	0.0466644
GLT8D3	1.03252	0.000670535	0.0471859
ST5	-1.24886	0.000672911	0.0472885
MED12L	-1.06532	0.000676656	0.0474869
RP5-1022P6.2	-1.15752	0.000679875	0.0476641
LYPD1	1.44361	0.00068113	0.0477359
C1orf116	-1.17505	0.000682217	0.0477959
KCNJ8	-1.88793	0.000683502	0.0478534
PAPLN	-1.34604	0.000684961	0.0479229
VIT	-2.47101	0.000691499	0.048282
PLEKHH2	-1.86995	0.000692916	0.0483645
ZBED2	1.90342	0.000695064	0.0484653
PALB2	1.05606	0.000702427	0.0488794
IQGAP2	-1.81281	0.00070354	0.0489164
LOC644450	-1.27676	0.00070827	0.0491864
PLA2G16	-1.2741	0.000709429	0.0492006
DDX49	1.03389	0.00070989	0.049216
FLJ40125	-1.02476	0.000712846	0.0493877
FLJ20674	1.30206	0.000718215	0.0497096
ACVR2A	-1.35273	0.000720394	0.0497981
KIAA1211	1.32277	0.000721579	0.049842
LOC730102	-1.02658	0.000722399	0.0498812
SEPT2	-1.2314	0.000722631	0.0498812
NCRNA00120	1.47498	0.000724011	0.0499597
FC: fold change.
