# Supplementary material for: Identification of hub genes and diagnostic efficacy for triple-negative breast cancer through WGCNA and Mendelian randomization
Source: Discov Oncol. 2024 Apr 12;15:117. doi: 10.1007/s12672-024-00970-w (PMC11014828; doi:10.1007/s12672-024-00970-w)
Supplement: Supplementary file 2 — Supplementary Table S2 [file 12672_2024_970_MOESM2_ESM.xlsx]

## Sheet: Sheet1
Supplementary Table S2: The genes of turquoise module identified by the WGCNA analysis.
Gene symbol
A1BG
A4GALT
AAAS
AADAT
AAK1
AARS
AARS2
AARSD1
AASDH
AASS
ABAT
ABCA10
ABCA11P
ABCA17P
ABCA3
ABCA5
ABCA6
ABCA8
ABCB1
ABCB10
ABCB7
ABCC1
ABCC10
ABCC2
ABCC3
ABCC4
ABCC5
ABCC8
ABCD1
ABCD2
ABCD3
ABCD4
ABCE1
ABCF1
ABCF2
ABCG2
ABCG4
ABHD1
ABHD10
ABHD11
ABHD12
ABHD12B
ABHD13
ABHD14A
ABHD14B
ABHD3
ABHD4
ABHD5
ABHD7
ABI1
ABI2
ABI3
ABI3BP
ABL2
ABLIM3
ABO
ABR
ABRA
ABTB1
ABTB2
ACAA2
ACAD11
ACAD9
ACADSB
ACADVL
ACAN
ACAP1
ACAP3
ACAT1
ACAT2
ACBD3
ACBD5
ACBD6
ACCN1
ACCN2
ACCS
ACD
ACE2
ACER3
ACLY
ACO1
ACOT1
ACOT2
ACOT7
ACOT9
ACOX3
ACPL2
ACRV1
ACSBG1
ACSBG2
ACSL1
ACSL6
ACSM1
ACSM3
ACSM5
ACTA1
ACTA2
ACTB
ACTC1
ACTG1
ACTG2
ACTL6A
ACTL7A
ACTL8
ACTN2
ACTR3
ACTR3B
ACTR5
ACTR8
ACVR1B
ACVR2A
ACY1
ACYP1
ADA
ADAL
ADAM10
ADAM12
ADAM32
ADAM7
ADAM8
ADAMTS1
ADAMTS14
ADAMTS15
ADAMTS16
ADAMTS19
ADAMTS2
ADAMTS3
ADAMTS4
ADAMTS5
ADAMTS6
ADAMTS8
ADAMTSL2
ADAR
ADC
ADCK5
ADCY1
ADCY3
ADCY7
ADCY9
ADCYAP1
ADD1
ADD2
ADD3
ADFP
ADH1A
ADH1C
ADH5
ADHFE1
ADIPOQ
ADIPOR1
ADIPOR2
ADM
ADNP
ADNP2
ADORA2A
ADORA3
ADPRH
ADPRHL1
ADRA2A
ADRA2C
ADRB2
ADRBK1
ADRM1
ADSS
ADSSL1
AEN
AFAP1L2
AFARP1
AFF3
AFF4
AFG3L2
AFP
AFTPH
AGA
AGAP1
AGAP10
AGAP8
AGBL2
AGBL3
AGER
AGFG1
AGFG2
AGGF1
AGL
AGMAT
AGPAT1
AGPAT3
AGPAT5
AGPAT6
AGR3
AGT
AGTPBP1
AGTR1
AGTR2
AGXT2L1
AGXT2L2
AHCTF1
AHCY
AHCYL1
AHCYL2
AHNAK
AHNAK2
AHSA2
AIDA
AIFM1
AIG1
AIM1
AK1
AK7
AKAP11
AKAP12
AKAP13
AKAP2
AKAP8
AKAP8L
AKIRIN1
AKIRIN2
AKR1A1
AKR1B10
AKR1CL2
AKR7A2
AKR7A3
AKT1
AKT1S1
AKT3
ALAD
ALB
ALCAM
ALDH18A1
ALDH1A1
ALDH1A2
ALDH1B1
ALDH1L2
ALDH2
ALDH3A2
ALDH7A1
ALDH9A1
ALDOAP2
ALG1
ALG3
ALG6
ALG8
ALG9
ALKBH3
ALKBH6
ALKBH8
ALMS1
ALMS1P
ALOX15B
ALPI
ALPK2
ALPK3
ALS2
ALS2CR11
ALS2CR8
ALX4
AMD1
AMDHD1
AMDHD2
AMFR
AMIGO1
AMIGO2
AMMECR1
AMN1
AMPD1
AMT
AMY1C
AMY2B
ANAPC11
ANAPC13
ANAPC4
ANAPC5
ANG
ANGEL2
ANGPT2
ANGPTL1
ANGPTL2
ANGPTL4
ANGPTL7
ANK3
ANKDD1A
ANKFN1
ANKHD1
ANKHD1-EIF4EBP3
ANKRA2
ANKRD1
ANKRD11
ANKRD12
ANKRD13A
ANKRD13C
ANKRD18A
ANKRD20A2
ANKRD24
ANKRD27
ANKRD29
ANKRD30A
ANKRD31
ANKRD32
ANKRD34B
ANKRD35
ANKRD40
ANKRD42
ANKRD43
ANKRD44
ANKRD45
ANKRD49
ANKRD54
ANKRD58
ANKRD6
ANKS1A
ANKS6
ANLN
ANO1
ANO10
ANO4
ANO5
ANO8
ANO9
ANP32E
ANTXR1
ANTXR2
ANUBL1
ANXA11
ANXA2P1
ANXA2P3
ANXA3
ANXA9
AOC3
AP1B1
AP1M2
AP1S1
AP1S3
AP2A1
AP2A2
AP2B1
AP2M1
AP2S1
AP3S2
AP4S1
APBA1
APBA2
APBA3
APBB2
APBB3
APC
APCDD1
APEX1
APEX2
APH1B
API5
APIP
APITD1
APLF
APLP2
APOBEC3B
APOBEC3C
APOBEC3D
APOBEC3F
APOD
APOLD1
APOO
APPBP2
APPL1
APTX
AQP1
AQP11
AQP4
AQP6
AQP7P2
AR
ARAP3
ARC
ARCN1
ARD1A
ARD1B
AREG
ARF1
ARF5
ARFGAP1
ARFGAP3
ARFGEF1
ARFGEF2
ARFRP1
ARG2
ARHGAP1
ARHGAP11A
ARHGAP18
ARHGAP19
ARHGAP20
ARHGAP21
ARHGAP23
ARHGAP24
ARHGAP28
ARHGAP6
ARHGDIA
ARHGDIB
ARHGEF11
ARHGEF12
ARHGEF16
ARHGEF18
ARHGEF3
ARHGEF4
ARHGEF6
ARHGEF9
ARID1A
ARID2
ARID3B
ARID4A
ARID4B
ARID5B
ARL10
ARL11
ARL14
ARL15
ARL3
ARL4A
ARL5B
ARL8A
ARMC1
ARMC4
ARMC8
ARMCX1
ARMCX3
ARMCX4
ARMCX5
ARMET
ARMETL1
ARP11
ARPC1A
ARPC1B
ARPC2
ARPC4
ARPC5
ARPC5L
ARPM1
ARR3
ARRB1
ARRDC4
ARS2
ARSB
ARSI
ARSK
ART1
ART3
ART4
ARV1
ASAH1
ASAH2
ASAM
ASAP1
ASAP3
ASB1
ASB13
ASB3
ASB8
ASB9
ASCC3
ASCL2
ASCL3
ASF1A
ASF1B
ASGR1
ASMT
ASNA1
ASNS
ASPA
ASPG
ASPH
ASPHD1
ASPM
ASPN
ASPSCR1
ASS1
ASTN2
ASXL1
ASXL2
ASXL3
ATAD1
ATAD2
ATAD2B
ATAD3A
ATAD3B
ATAD4
ATAD5
ATE1
ATF1
ATF2
ATF3
ATF5
ATF6
ATF7
ATG10
ATG16L2
ATG2B
ATG3
ATG4A
ATG4B
ATG9A
ATG9B
ATHL1
ATL1
ATL3
ATM
ATN1
ATOH8
ATP10D
ATP11A
ATP11B
ATP11C
ATP13A1
ATP13A3
ATP1A2
ATP1B3
ATP1B4
ATP2B1
ATP2B4
ATP2C1
ATP4B
ATP5C1
ATP5G1
ATP5G2
ATP5J2
ATP5L
ATP5O
ATP6AP2
ATP6V0A2
ATP6V0A4
ATP6V0B
ATP6V1B1
ATP6V1B2
ATP6V1C1
ATP6V1E1
ATP6V1E2
ATP6V1F
ATP7A
ATP8B1
ATP8B2
ATP9B
ATPAF1
ATPAF2
ATPBD4
ATR
ATRIP
ATRN
ATXN2L
ATXN7
AUH
AUP1
AURKA
AURKAIP1
AURKB
AVIL
AVPI1
AVPR1A
AXIN1
AXIN2
AZGP1
AZGP1P1
AZI1
AZI2
AZIN1
B3GALNT2
B3GALT1
B3GALT5
B3GALT6
B3GAT1
B3GAT2
B3GNT1
B3GNT2
B3GNT4
B3GNT5
B3GNT9
B4GALNT4
B4GALT1
B4GALT2
B4GALT5
B9D2
BAALC
BACE1
BACE2
BACH1
BACH2
BAG1
BAG3
BAGE
BAHCC1
BAIAP2L1
BAK1
BANF1
BANF2
BANP
BARD1
BARHL1
BARX1
BAT2
BAT2D1
BAT2L
BAT3
BATF
BAX
BAZ1A
BBS1
BBS10
BBS12
BBS2
BBX
BCAN
BCAP29
BCAP31
BCAS1
BCAT1
BCKDHA
BCL10
BCL11A
BCL11B
BCL2
BCL2L11
BCL2L12
BCL2L13
BCL2L14
BCL6
BCL7B
BCL9
BCL9L
BCMO1
BCO2
BCOR
BCORL1
BCR
BDH2
BDKRB1
BDNF
BECN1
BEND3
BEND5
BEND7
BEST1
BEST3
BET1L
BET3L
BEX1
BEX2
BEX5
BFAR
BFSP1
BHLHA15
BHLHE40
BHLHE41
BHMT2
BICD1
BID
BIRC5
BIRC6
BIRC8
BLCAP
BLID
BLM
BLMH
BLOC1S2
BLVRA
BLVRB
BLZF1
BMP1
BMP2
BMP2K
BMP3
BMP5
BMPR1B
BMS1
BMS1P5
BNC1
BNIP1
BNIP2
BOLA1
BOLA2B
BOLA3
BOP1
BPA-1
BPI
BPIL2
BPNT1
BPY2B
BRAP
BRCA1
BRD4
BRD7
BRD8
BRIP1
BRMS1
BRMS1L
BRP44
BRPF1
BRPF3
BRS3
BRUNOL4
BRUNOL5
BRUNOL6
BRWD2
BRWD3
BSCL2
BSN
BSPRY
BTAF1
BTBD11
BTBD12
BTBD7
BTF3
BTG2
BTG3
BTG4
BTLA
BTNL9
BTRC
BUB1
BUB1B
BUB3
BVES
BXDC1
BXDC2
BYSL
C10orf104
C10orf107
C10orf110
C10orf111
C10orf12
C10orf126
C10orf136
C10orf18
C10orf2
C10orf32
C10orf33
C10orf4
C10orf49
C10orf53
C10orf78
C10orf79
C10orf88
C10orf92
C11orf1
C11orf10
C11orf16
C11orf20
C11orf24
C11orf30
C11orf31
C11orf40
C11orf41
C11orf45
C11orf54
C11orf57
C11orf59
C11orf60
C11orf67
C11orf68
C11orf70
C11orf73
C11orf75
C11orf79
C11orf80
C11orf82
C11orf83
C11orf84
C11orf9
C12orf10
C12orf24
C12orf26
C12orf27
C12orf29
C12orf32
C12orf39
C12orf42
C12orf44
C12orf47
C12orf48
C12orf5
C12orf50
C12orf54
C12orf64
C12orf66
C12orf72
C13orf15
C13orf27
C13orf3
C13orf33
C13orf34
C13orf37
C14orf106
C14orf113
C14orf118
C14orf119
C14orf132
C14orf135
C14orf143
C14orf147
C14orf148
C14orf166
C14orf167
C14orf169
C14orf177
C14orf25
C14orf28
C14orf39
C14orf4
C14orf43
C14orf45
C14orf50
C14orf56
C14orf65
C14orf83
C15orf15
C15orf17
C15orf21
C15orf23
C15orf26
C15orf27
C15orf31
C15orf32
C15orf37
C15orf38
C15orf39
C15orf40
C15orf41
C15orf42
C15orf57
C15orf62
C16orf13
C16orf42
C16orf45
C16orf48
C16orf5
C16orf52
C16orf58
C16orf59
C16orf61
C16orf65
C16orf67
C16orf70
C16orf71
C16orf72
C16orf75
C16orf84
C16orf87
C16orf88
C16orf89
C17orf37
C17orf42
C17orf47
C17orf48
C17orf49
C17orf53
C17orf59
C17orf75
C17orf77
C17orf78
C17orf79
C17orf85
C17orf89
C17orf91
C17orf97
C17orf98
C18orf15
C18orf19
C18orf21
C18orf24
C18orf25
C18orf26
C18orf34
C18orf45
C18orf49
C18orf51
C18orf56
C19orf12
C19orf18
C19orf21
C19orf28
C19orf29
C19orf30
C19orf33
C19orf39
C19orf41
C19orf42
C19orf43
C19orf48
C19orf50
C19orf53
C19orf55
C19orf61
C19orf62
C19orf68
C19orf69
C19orf71
C1D
C1GALT1
C1QTNF5
C1RL
C1orf100
C1orf101
C1orf102
C1orf104
C1orf106
C1orf107
C1orf112
C1orf113
C1orf115
C1orf116
C1orf118
C1orf122
C1orf128
C1orf131
C1orf135
C1orf145
C1orf156
C1orf168
C1orf174
C1orf186
C1orf187
C1orf198
C1orf2
C1orf203
C1orf204
C1orf210
C1orf211
C1orf215
C1orf226
C1orf25
C1orf26
C1orf27
C1orf31
C1orf35
C1orf50
C1orf51
C1orf52
C1orf53
C1orf55
C1orf56
C1orf58
C1orf59
C1orf61
C1orf62
C1orf63
C1orf64
C1orf66
C1orf67
C1orf71
C1orf74
C1orf77
C1orf81
C1orf83
C1orf85
C1orf89
C1orf9
C1orf91
C1orf95
C1orf96
C1orf97
C20orf107
C20orf108
C20orf11
C20orf114
C20orf117
C20orf12
C20orf151
C20orf160
C20orf196
C20orf20
C20orf24
C20orf29
C20orf54
C20orf59
C20orf7
C20orf72
C20orf96
C21orf119
C21orf122
C21orf15
C21orf29
C21orf45
C21orf49
C21orf54
C21orf57
C21orf59
C21orf63
C21orf66
C21orf67
C21orf70
C21orf71
C21orf87
C21orf90
C22orf23
C22orf28
C22orf30
C22orf36
C22orf39
C22orf9
C2CD2
C2CD2L
C2CD3
C2orf12
C2orf14
C2orf15
C2orf18
C2orf21
C2orf27
C2orf29
C2orf3
C2orf30
C2orf34
C2orf40
C2orf42
C2orf47
C2orf49
C2orf50
C2orf52
C2orf63
C2orf64
C2orf66
C2orf68
C2orf69
C2orf73
C2orf74
C2orf80
C2orf83
C3orf14
C3orf17
C3orf18
C3orf23
C3orf26
C3orf38
C3orf44
C3orf45
C3orf52
C3orf54
C3orf58
C3orf59
C3orf63
C3orf64
C3orf70
C3orf71
C4B
C4orf10
C4orf12
C4orf15
C4orf16
C4orf18
C4orf19
C4orf22
C4orf26
C4orf36
C4orf39
C4orf41
C4orf46
C4orf8
C5
C5AR1
C5orf13
C5orf15
C5orf22
C5orf23
C5orf24
C5orf26
C5orf27
C5orf30
C5orf32
C5orf34
C5orf35
C5orf37
C5orf38
C5orf4
C5orf41
C5orf42
C5orf43
C5orf44
C5orf45
C5orf46
C6
C6orf1
C6orf10
C6orf106
C6orf115
C6orf124
C6orf125
C6orf129
C6orf130
C6orf141
C6orf142
C6orf150
C6orf153
C6orf162
C6orf165
C6orf167
C6orf173
C6orf182
C6orf192
C6orf199
C6orf204
C6orf211
C6orf218
C6orf223
C6orf225
C6orf25
C6orf35
C6orf47
C6orf57
C6orf70
C6orf72
C6orf97
C7
C7orf11
C7orf13
C7orf16
C7orf23
C7orf25
C7orf28A
C7orf28B
C7orf34
C7orf36
C7orf38
C7orf40
C7orf41
C7orf63
C7orf64
C8orf15
C8orf22
C8orf30A
C8orf31
C8orf33
C8orf38
C8orf39
C8orf4
C8orf46
C8orf5
C8orf51
C8orf55
C8orf60
C8orf76
C8orf77
C8orf79
C8orf83
C9orf102
C9orf103
C9orf11
C9orf119
C9orf123
C9orf125
C9orf129
C9orf142
C9orf144B
C9orf156
C9orf30
C9orf33
C9orf37
C9orf40
C9orf43
C9orf44
C9orf47
C9orf53
C9orf6
C9orf61
C9orf69
C9orf72
C9orf78
C9orf80
C9orf84
C9orf85
C9orf89
C9orf97
CA12
CA3
CA5B
CA5BL
CA8
CA9
CAB39L
CABC1
CABLES2
CABYR
CACHD1
CACNA1C
CACNA1D
CACNA2D1
CACNA2D2
CACNA2D3
CACNB4
CACNG4
CACYBP
CAD
CADM4
CADPS2
CALB2
CALCA
CALCOCO1
CALCOCO2
CALCR
CALD1
CALHM1
CALM2
CALML5
CALR
CALU
CAMK1
CAMK1D
CAMK1G
CAMK2D
CAMK4
CAMKK2
CAMLG
CAMP
CAMSAP1L1
CAMTA1
CAMTA2
CAPG
CAPN1
CAPN10
CAPN11
CAPN12
CAPN14
CAPN2
CAPN3
CAPN8
CAPN9
CAPNS1
CAPNS2
CAPRIN1
CAPS
CAPS2
CAPZA1
CAPZA3
CAPZB
CARD6
CARHSP1
CARKD
CARS
CARS2
CASC5
CASD1
CASP10
CASP14
CASP2
CASP3
CASP4
CASP8AP2
CASQ1
CASR
CAST
CAT
CATR1
CATSPER2
CATSPERB
CAV1
CAV2
CAV3
CBFA2T2
CBFA2T3
CBFB
CBL
CBLB
CBLL1
CBLN4
CBR1
CBS
CBX1
CBX3
CBX7
CBX8
CC2D2A
CC2D2B
CCAR1
CCBP2
CCDC101
CCDC103
CCDC109B
CCDC110
CCDC112
CCDC115
CCDC117
CCDC12
CCDC121
CCDC122
CCDC125
CCDC132
CCDC135
CCDC138
CCDC142
CCDC146
CCDC15
CCDC151
CCDC153
CCDC155
CCDC25
CCDC26
CCDC27
CCDC28A
CCDC28B
CCDC36
CCDC37
CCDC41
CCDC43
CCDC46
CCDC47
CCDC48
CCDC49
CCDC5
CCDC50
CCDC51
CCDC53
CCDC55
CCDC56
CCDC58
CCDC6
CCDC62
CCDC65
CCDC67
CCDC68
CCDC7
CCDC74B
CCDC75
CCDC76
CCDC77
CCDC79
CCDC83
CCDC84
CCDC86
CCDC88A
CCDC88C
CCDC89
CCDC91
CCDC92
CCDC93
CCDC99
CCHCR1
CCK
CCKAR
CCKBR
CCL15
CCL25
CCL27
CCL28
CCL7
CCNA2
CCNB1
CCNB2
CCNC
CCND3
CCNE1
CCNE2
CCNG1
CCNG2
CCNH
CCNJ
CCNYL1
CCPG1
CCRK
CCRN4L
CCT3
CCT4
CCT6A
CCT6B
CCT6P1
CCT8
CD109
CD163L1
CD164
CD200
CD207
CD24
CD248
CD27
CD276
CD2AP
CD300A
CD300E
CD302
CD36
CD37
CD3EAP
CD44
CD46
CD47
CD58
CD59
CD99
CD99L2
CDA
CDAN1
CDC123
CDC14A
CDC2
CDC20
CDC25A
CDC25B
CDC25C
CDC27
CDC2L2
CDC37
CDC42BPB
CDC42BPG
CDC42EP3
CDC42SE1
CDC42SE2
CDC45L
CDC5L
CDC6
CDC7
CDC73
CDCA2
CDCA3
CDCA4
CDCA5
CDCA7
CDCA8
CDGAP
CDH1
CDH12
CDH13
CDH19
CDH2
CDH3
CDH5
CDIPT
CDK10
CDK2AP1
CDK2AP2
CDK3
CDK4
CDK5RAP3
CDK6
CDK8
CDKL2
CDKL5
CDKN1A
CDKN2A
CDKN2AIPNL
CDKN2B
CDKN2C
CDKN2D
CDKN3
CDO1
CDRT4
CDS2
CDYL2
CEACAM4
CEACAM5
CEBPB
CEBPG
CEBPZ
CECR7
CELSR1
CELSR2
CELSR3
CENPA
CENPB
CENPC1
CENPE
CENPF
CENPI
CENPJ
CENPK
CENPL
CENPM
CENPN
CENPO
CENPP
CENPQ
CENPV
CEP110
CEP120
CEP170
CEP192
CEP250
CEP27
CEP290
CEP55
CEP57
CEP63
CEP68
CEP70
CEP76
CEP78
CEP97
CETN3
CFD
CFI
CFL1
CFL2
CFLAR
CFLP1
CFTR
CGGBP1
CGN
CGNL1
CGREF1
CH25H
CHAC2
CHAF1A
CHAF1B
CHAT
CHCHD2
CHCHD3
CHCHD4
CHD1
CHD1L
CHD2
CHD3
CHD4
CHD6
CHD7
CHD9
CHDH
CHEK1
CHEK2
CHGB
CHI3L1
CHIC1
CHID1
CHIT1
CHKB
CHL1
CHM
CHML
CHMP1B
CHMP2A
CHMP4A
CHMP5
CHN2
CHORDC1
CHP
CHPT1
CHRAC1
CHRDL2
CHRFAM7A
CHRM5
CHRNA10
CHRNA2
CHRNA3
CHRNA5
CHRNA6
CHRNB1
CHRNB4
CHST12
CHST6
CHSY1
CHTF18
CHURC1
CIAO1
CIAPIN1P
CIB2
CIB3
CIC
CIDEA
CIDEB
CIDECP
CILP2
CINP
CIR
CIRBP
CIRH1A
CISD2
CISH
CIT
CITED1
CITED2
CITED4
CIZ1
CKAP2
CKAP2L
CKAP5
CKLF
CKMT1B
CKMT2
CKS1B
CKS2
CLASP1
CLCN1
CLCN2
CLCN3
CLCN5
CLCN6
CLDN1
CLDN11
CLDN12
CLDN14
CLDN23
CLDN4
CLDN6
CLDN7
CLDN8
CLEC11A
CLEC3B
CLEC4D
CLEC4F
CLIC1
CLIC4
CLIC6
CLIP1
CLIP4
CLK1
CLK4
CLMN
CLN3
CLN5
CLP1
CLPB
CLPP
CLSPN
CLSTN2
CLTA
CLTC
CLU
CLUL1
CLYBL
CMA1
CMC1
CMIP
CMTM3
CMYA5
CNBD1
CNBP
CNDP1
CNIH2
CNIH4
CNKSR1
CNKSR3
CNN1
CNN2
CNN3
CNNM1
CNNM3
CNOT6L
CNOT7
CNP
CNPY3
CNPY4
CNRIP1
CNTD1
CNTFR
CNTN2
CNTN3
CNTNAP3
COCH
COG1
COG2
COG3
COG5
COG6
COG8
COIL
COL10A1
COL11A1
COL14A1
COL16A1
COL17A1
COL21A1
COL24A1
COL4A1
COL4A3BP
COL4A6
COL5A3
COL6A6
COL8A1
COL8A2
COL9A2
COL9A3
COLEC11
COLEC12
COMMD1
COMMD2
COMMD4
COMMD5
COMMD6
COMMD8
COMTD1
COPA
COPB2
COPG
COPS2
COPS4
COPS5
COPS8
COQ10A
COQ2
COQ3
COQ6
COQ7
COQ9
CORO1C
CORO2B
COX1
COX15
COX17
COX19
COX4I2
COX5A
COX6A1
COX6B2
COX7A1
COX7B
COX7C
COX8A
CP
CPA4
CPB1
CPE
CPEB2
CPEB3
CPEB4
CPLX4
CPN1
CPNE8
CPO
CPOX
CPS1
CPSF1
CPSF4
CPT1A
CPT1B
CPT1C
CPT2
CPVL
CPXCR1
CRABP1
CRBN
CRCP
CREB1
CREB3L2
CREG1
CREG2
CRELD2
CREM
CRHR2
CRIPT
CRISP1
CRISP2
CRISP3
CRISPLD1
CRISPLD2
CRLF3
CRLS1
CRNKL1
CROCCL1
CROCCL2
CROT
CRTAP
CRTC2
CRTC3
CRY2
CRYAB
CRYBA1
CRYBA2
CRYBB2
CRYBB2P1
CRYGN
CRYGS
CRYL1
CRYM
CRYZ
CRYZL1
CSAD
CSAG1
CSE1L
CSF1
CSGALNACT1
CSMD1
CSNK1A1
CSNK1D
CSNK1G2
CSNK1G3
CSPP1
CSRNP3
CSRP1
CSRP2
CSRP2BP
CST3
CST5
CST6
CST7
CST9L
CSTA
CSTB
CSTF1
CSTF2
CSTF2T
CSTF3
CSTL1
CTAG1A
CTAGE3
CTAGEP
CTBP1
CTD-2267G17.3
CTDSPL2
CTF8
CTGF
CTHRC1
CTNNA1
CTNNB1
CTNND2
CTPS
CTPS2
CTSA
CTSB
CTSC
CTSF
CTSG
CTSL1
CTSL2
CTSO
CTSZ
CTTNBP2
CTTNBP2NL
CUBN
CUL1
CUL2
CUL3
CUL4B
CUL7
CUTC
CUX2
CUZD1
CWC15
CWC22
CWF19L2
CX3CL1
CX3CR1
CXADR
CXADRP2
CXADRP3
CXCL12
CXCL14
CXCL17
CXCL2
CXCL5
CXCR4
CXXC4
CXXC5
CXorf15
CXorf23
CXorf24
CXorf26
CXorf36
CXorf38
CXorf39
CXorf40B
CXorf42
CXorf50
CXorf51
CXorf52
CXorf56
CXorf57
CXorf61
CYB561
CYB5D1
CYBA
CYBASC3
CYBRD1
CYCS
CYFIP1
CYFIP2
CYHR1
CYP17A1
CYP19A1
CYP24A1
CYP26A1
CYP27B1
CYP2A7
CYP2C19
CYP2C8
CYP2C9
CYP2E1
CYP2J2
CYP2U1
CYP3A7
CYP4B1
CYP4F11
CYP4F12
CYP4F22
CYP4V2
CYTH1
CYTSA
CYTSB
CYorf14
D21S2091E
D2HGDH
D4S234E
DAAM2
DAB2
DACH1
DACT3
DAD1
DALRD3
DAND5
DAP
DAP3
DAPK1
DAPL1
DARS2
DAZ2
DAZAP1
DBI
DBNDD2
DBR1
DBT
DCBLD1
DCBLD2
DCD
DCDC2
DCHS1
DCI
DCK
DCLK1
DCLK2
DCLRE1A
DCLRE1B
DCLRE1C
DCP1A
DCP1B
DCPS
DCTN1
DCTN4
DCUN1D1
DCUN1D2
DCUN1D5
DDA1
DDEF1IT1
DDHD1
DDI1
DDI2
DDIT3
DDIT4
DDOST
DDR1
DDT
DDX10
DDX11
DDX17
DDX19A
DDX21
DDX24
DDX27
DDX28
DDX39
DDX4
DDX43
DDX49
DDX5
DDX50
DDX51
DDX52
DDX54
DDX55
DDX59
DEAF1
DECR1
DEDD
DEFA1
DEFA3
DEFB103A
DEFB114
DEGS1
DEK
DEM1
DENND2C
DENND4B
DENND5B
DENR
DEPDC1
DEPDC1B
DEPDC5
DEPDC7
DERL1
DET1
DEXI
DFFB
DFNA5
DFNB59
DGAT2
DGCR6
DGCR6L
DGKA
DGKG
DGKH
DGUOK
DHCR7
DHDH
DHFR
DHRS12
DHRS13
DHRS4
DHRS7
DHRS7B
DHRS7C
DHRS9
DHTKD1
DHX15
DHX16
DHX29
DHX33
DHX34
DHX36
DHX40
[truncated: 6,449 more rows]
